# Supplementary material for: Identification of ARUK2002821 as an isoform-selective PI5P4Kα inhibitor
Source: Royal Society of Chemistry journal article supplement (doi:10.1039/d3md00039g), 2023-01-01
Supplement: d3md00039g1.pdf [file d3md00039g1.pdf]

## Supporting information

### Identification of ARUK2002821 as an isoform-selective PI5P4K $\alpha$ inhibitor

Henriëtte M. G. Willems, Simon Edwards, Helen K. Boffey, Stephen J. Chawner, Christopher Green, Tamara Romero, David Winpenny, John Skidmore, Jonathan H. Clarke and Stephen P. Andrews\*

#### Affiliations

The ALBORADA Drug Discovery Institute, University of Cambridge, Island Research Building, Cambridge Biomedical Campus, Hills Road, Cambridge, CB2 0AH, United Kingdom

#### Corresponding Author

\*E-mail: spa26@cam.ac.uk

#### Table of contents

|                                                                                                                    | Page |
|--------------------------------------------------------------------------------------------------------------------|------|
| Abbreviations                                                                                                      | S2   |
| Chemical synthesis                                                                                                 | S3   |
| General experimental                                                                                               | S3   |
| General procedures 1 and 2                                                                                         | S4   |
| Synthesis of Imanixil ( <b>7</b> )                                                                                 | S5   |
| Synthesis procedures                                                                                               | S9   |
| Data for the commercially available compound <b>20</b>                                                             | S34  |
| Spectra for key compounds <b>20</b> , <b>36</b> , <b>39</b> , <b>43</b> and <b>45</b>                              | S35  |
| Commercially available test compounds                                                                              | S39  |
| <b>Table S1.</b> Analogues of <b>10</b> for which PI5P4K $\alpha$ and $\gamma$ pIC <sub>50</sub> s were determined | S40  |
| <b>Table S2.</b> Analogues of <b>11</b> for which PI5P4K $\alpha$ and $\gamma$ pIC <sub>50</sub> s were determined | S40  |

|                                                                                                                                        |     |
|----------------------------------------------------------------------------------------------------------------------------------------|-----|
| <b>Table S3.</b> Additional commercial analogues of <b>8</b> for which PI5P4K $\alpha$ and $\gamma$ pIC <sub>50s</sub> were determined | S40 |
| <b>Table S4.</b> ADP-Glo PI5P4K activity data for Imanixil ( <b>7</b> )                                                                | S41 |
| <b>Table S5.</b> Crystallographic data and structure refinement for Imanixil ( <b>7</b> )                                              | S41 |
| <b>Table S6.</b> Crystallographic bond length data for Imanixil ( <b>7</b> )                                                           | S42 |
| <b>Table S7.</b> Crystallographic bond angle data for Imanixil ( <b>7</b> )                                                            | S42 |
| <b>Table S8.</b> Lipid kinase panel screening for Imanixil ( <b>7</b> ) at DiscoverX                                                   | S43 |
| <b>Table S9.</b> Lipid kinase panel screening for Imanixil ( <b>7</b> ) at MRC PPU International Centre for Kinase Profiling           | S44 |
| <b>Table S10.</b> Lipid kinase panel screening for compound <b>36</b>                                                                  | S44 |
| <b>Table S11.</b> Premier Screen kinase panel screening for compound <b>36</b>                                                         | S44 |
| <b>Table S12.</b> Crystallographic data and structure refinement for <b>36</b> -PI5P4K $\alpha$                                        | S47 |
| <b>Table S13.</b> Crystallographic data and structure refinement for Compound <b>20</b>                                                | S47 |
| <b>Table S14.</b> Crystallographic bond length data for Compound <b>20</b>                                                             | S48 |
| <b>Table S15.</b> Crystallographic bond angle data for Compound <b>20</b>                                                              | S48 |
| ADMET experimental methods                                                                                                             | S49 |
| Consideration of dihedral angles for <b>32</b> , <b>35</b> and <b>36</b>                                                               | S50 |
| References                                                                                                                             | S51 |

**Abbreviations:** DCE: 1,2-dichloroethane, DCM: dichloromethane, DiPEA: Diisopropylethylamine, DMF: dimethylformamide, eq: equivalents, IPA: *iso*-propanol, MeCN: acetonitrile, MeOH: methanol, min: minutes, NMP: N-methyl-2-pyrrolidone, rt: room temperature.

## Chemical Synthesis

### General Experimental

Imanixil (**7**) and precursors were prepared by Wuxi AppTec, China, other final compounds were purchased as indicated or synthesised at ALBORADA Drug Discovery Institute. Reagents and solvents were of commercially available reagent grade quality and used without further purification. Reactions requiring anhydrous conditions were carried out in oven dried glassware under an atmosphere of N<sub>2</sub>. Reactions were monitored by thin-layer chromatography (TLC) on silica gel 60 F<sub>254</sub> aluminium or glass supported sheets, or by liquid chromatography-mass spectrometry (LC-MS). Flash column chromatography was carried out on a Biotage Isolera One system using normal phase (SiO<sub>2</sub>) or reverse phase (C18) cartridges. Compounds were loaded in solution or adsorbed onto Celite® 545 or ISOLUTE® HM-N, and eluted using a linear gradient of the specified solvents. Purification by C18 reverse phase HPLC was carried using an Agilent 1260 Infinity machine and a Waters XBridge BEH C18 OBD column (130 Å, 5 µm, 30 mm × 100 mm) with a linear gradient of H<sub>2</sub>O (with 0.1% NH<sub>3</sub>) and MeCN (with 0.1% NH<sub>3</sub>). LCMS analysis was performed on a Waters Aquity HClass UPLC system with a Aquity QDa for mass detection. NMR spectra were recorded on a Bruker Advance III (<sup>1</sup>H = 300 MHz, <sup>19</sup>F = 282 MHz) spectrometer using the requisite solvent as a reference for internal deuterium lock. The chemical shift data for each signal are given as δ chemical shift (multiplicity, *J* values in Hz, integration) in units of parts per million (ppm) relative to tetramethylsilane (TMS) where δH (TMS) = 0.00 ppm. The multiplicity of each signal is indicated by: s (singlet), d (doublet), t (triplet), q (quartet), quin (quintet), or m (multiplet). Signals from exchangeable protons are not always detected. UPLC analysis of final compounds was performed on a Waters Aquity HClass UPLC system and is reported as method name, retention time, UV % purity. The method parameters are as follows:

| Method | Column                                  | Additive                | Flow rate  | Gradient (time, %MeCN in H <sub>2</sub> O)                                     |
|--------|-----------------------------------------|-------------------------|------------|--------------------------------------------------------------------------------|
| A      | BEH C18 (130 Å, 1.7 µm, 2.1 mm × 50 mm) | 10 mM NH <sub>3</sub>   | 0.6 mL/min | 0 min, 5%; 0.8 min, 5%; 3.3 min, 95%; 4.3 min, 95%; 4.5 min, 5%; 5.5 min, 5%.  |
| B      | HSS C18 (100 Å, 1.8 µm, 2.1 mm × 50 mm) | 0.1% HCO <sub>2</sub> H | 0.6 mL/min | 0 min, 5%; 0.8 min, 5%; 3.3 min, 95%; 4.3 min, 95%; 4.5 min, 5%; 5.5 min, 5%.  |
| C      | BEH C18 (130 Å, 1.7 µm, 2.1 mm × 50 mm) | 10 mM NH <sub>3</sub>   | 0.6 mL/min | 0 min, 5%; 0.8 min, 5%; 8.3 min, 95%; 9.3 min, 95%; 9.5 min, 5%; 10.5 min, 5%. |
| D      | HSS C18 (100 Å, 1.8 µm, 2.1 mm × 50 mm) | 0.1% HCO <sub>2</sub> H | 0.6 mL/min | 0 min, 5%; 0.8 min, 5%; 8.3 min, 95%; 9.3 min, 95%; 9.5 min, 5%; 10.5 min, 5%. |

**General Procedure 1<sup>1</sup>: Hydrazone formation (Scheme 1, reaction a):**

A solution of the requisite hydrazine (Caution! toxic; 1.0 eq) and the requisite aldehyde (1.05 eq) in DMF (Caution! Carcinogenic; 0.7 M) was stirred at rt for the stated period of time. The reaction was poured into cold NaHCO<sub>3</sub> solution, stirred for 15 min, filtered and dried *in vacuo*. The hydrazone thus obtained was used without further purification.

**General Procedure 2<sup>1,2</sup>: Cyclisation/Displacement (Scheme 1, reaction b):**

A microwave flask was charged with the requisite hydrazone (1.0 eq), dissolved in MeCN (1 M) and heated at 185 °C for the stated time. The reaction was cooled and the requisite amine (1.1 eq) and DiPEA (3.0 eq) were added. The mixture was then sealed and heated thermally for the stated time and temperature. Upon cooling to rt the reaction mixture was concentrated *in vacuo* and purified by the stated method.

**Scheme 1:**

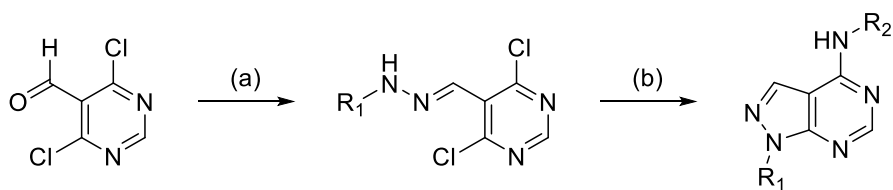

Reagents and conditions: (a) R<sub>1</sub>-NHNH<sub>2</sub>, DMF, rt. (b) i) MeCN, 185 °C ii) R<sub>2</sub>-NH<sub>2</sub>, DiPEA, 125-140 °C.

## Synthesis of Imanixil, 4-amino-2-(4,4-dimethyl-2-oxoimidazolidin-1-yl)-N-(3-(trifluoromethyl)

### phenyl)pyrimidine-5-carboxamide (7)<sup>3,4</sup>

#### 2-Bromo-4,4-dimethyl-4,5-dihydrooxazole

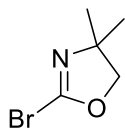

To a solution of 4,4-dimethyl-4,5-dihydrooxazole (19.0 g, 190 mmol, 1.0 eq) in THF (600 mL) was added *t*-BuLi (Caution! Flammable; 210 mmol, 1.1 eq) over a period of 5 min at -78 °C and the resulting yellow solution was stirred for 25 min. 1,2-Dibromo-1,1,2,2-tetrafluoro-ethane (Caution! toxic; 60 g, 230 mmol, 1.2 eq) was added and the solution was warmed to rt and then stirred for 6 h. The reaction mixture was quenched with sat. NH<sub>4</sub>Cl and extracted with ethyl acetate (2 x 200 mL), dried (Na<sub>2</sub>SO<sub>4</sub>) and concentrated *in vacuo* to yield 2-bromo-4,4-dimethyl-4,5-dihydrooxazole (27.0 g, 152 mmol, 79% yield) as a yellow oil and was used in next step without further purification. <sup>1</sup>H NMR (400 MHz, CDCl<sub>3</sub>) δ 4.15 (s, 2H), 1.36 (s, 6H).

#### 1-Bromo-2-isocyanato-2-methylpropane

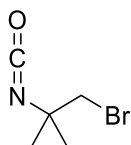

A solution of 2-bromo-4,4-dimethyl-4,5-dihydrooxazole (27.0 g, 152 mmol, 1.0 eq) in THF (300 mL) was stirred at 65 °C for 16 h. The reaction solution was concentrated *in vacuo* to yield 1-bromo-2-isocyanato-2-methylpropane (Caution! toxic; 26.0 g, 146 mmol, 96% yield) as a yellow oil which was used without further purification. <sup>1</sup>H NMR (400 MHz, CDCl<sub>3</sub>) δ 3.48 (s, 2H), 1.50 (s, 6H).

Ethyl 2-(4,4-dimethyl-2-oxoimidazolidin-1-yl)-4-hydroxypyrimidine-5-carboxylate

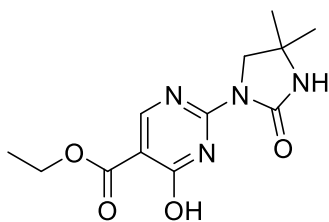

A suspension of ethyl 2-amino-4-hydroxypyrimidine-5-carboxylate (17.0 g, 93 mmol, 1.00 eq) in DMF (Caution! Carcinogenic; 200 mL) was heated to 100 °C with stirring for 1 h and then the mixture was cooled to 15 °C and stirred for a further 30 min at this temperature. 1-Bromo-2-isocyanato-2-methylpropane (Caution! toxic; 19.8 g, 111 mmol, 1.2 eq) was charged into the flask *via* syringe over 10 min. The reaction mixture was stirred at 100 °C for another 4 h. The reaction solution was poured into H<sub>2</sub>O (1000 mL), stirred for 30 min and extracted with DCM (Caution! Carcinogenic; 3 x 200 mL). The combined organic phases were concentrated *in vacuo* and the crude product was crystallised from (petroleum ether:ethyl acetate = 3:1) (2 x 100 mL) to yield ethyl 2-(4,4-dimethyl-2-oxoimidazolidin-1-yl)-4-hydroxypyrimidine-5-carboxylate (13.2 g, 47.1 mmol, 50% yield) as a white solid. <sup>1</sup>H NMR (400 MHz, CDCl<sub>3</sub>) δ 8.84 (s, 1H), 4.35 (q, *J* = 7.0 Hz, 2H), 3.86 (s, 2H), 1.42–1.35 (m, 9H) (exchangeable OH and NH protons not observed).

Ethyl 4-chloro-2-(4,4-dimethyl-2-oxoimidazolidin-1-yl)pyrimidine-5-carboxylate

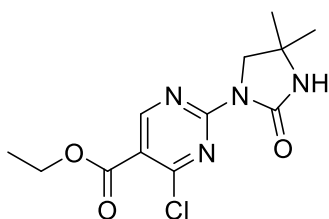

A solution of ethyl 2-(4,4-dimethyl-2-oxoimidazolidin-1-yl)-4-hydroxypyrimidine-5-carboxylate (13.2 g, 47 mmol, 1.0 eq) in thionyl chloride (Caution! toxic; 112 g, 942 mmol, 68 mL, 20 eq) was stirred at 100 °C for 4 h. The reaction solution was concentrated *in vacuo* to yield ethyl 4-chloro-2-(4,4-dimethyl-2-oxoimidazolidin-1-yl)pyrimidine-5-carboxylate (14.0 g, 47 mmol, 100% yield) as a white solid which was used without further purification.

Ethyl 4-amino-2-(4,4-dimethyl-2-oxoimidazolidin-1-yl)pyrimidine-5-carboxylate

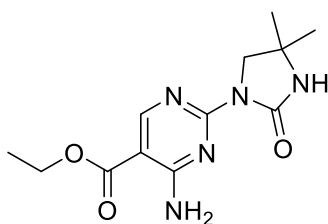

To a solution of ethyl 4-chloro-2-(4,4-dimethyl-2-oxoimidazolidin-1-yl)pyrimidine-5-carboxylate (12.2 g, 41 mmol, 1.0 eq) in THF (100 mL) was added a solution of  $\text{NH}_3$  (696 mg, 41 mmol, 1.0 eq) in THF (100 mL). The reaction solution was stirred at 15 °C for 4 h, then was quenched with  $\text{H}_2\text{O}$  (100 mL) and extracted with DCM (Caution! Carcinogenic; 3 x 100 mL). The combined organic phases were washed with sat. aq. NaCl (100 mL) and concentrated *in vacuo* to yield ethyl 4-amino-2-(4,4-dimethyl-2-oxoimidazolidin-1-yl)pyrimidine-5-carboxylate (11.0 g, 39 mmol, 96% yield) as a white solid.  $^1\text{H}$  NMR (400 MHz,  $\text{MeOD-d}_4$ )  $\delta$  8.71 (s, 1H), 5.51 (s, 1H), 4.35 (q,  $J = 7.0$  Hz, 2H), 3.85 (s, 2H), 1.41–1.35 (m, 9H) (exchangeable 2 x NH protons not observed).

Lithium 4-amino-2-(4,4-dimethyl-2-oxoimidazolidin-1-yl)pyrimidine-5-carboxylate

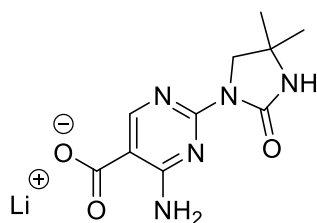

To a solution of ethyl 4-amino-2-(4,4-dimethyl-2-oxoimidazolidin-1-yl)pyrimidine-5-carboxylate (11.0 g, 39 mmol, 1.0 eq) in THF (200 mL) was added  $\text{LiOH}\cdot\text{H}_2\text{O}$  (8.3 g, 197 mmol, 5.0 eq) in  $\text{H}_2\text{O}$  (20 mL). The mixture was stirred at 65 °C for 4 h, concentrated *in vacuo* and the product was recrystallised from  $\text{H}_2\text{O}$  (20 mL) to yield lithium 4-amino-2-(4,4-dimethyl-2-oxoimidazolidin-1-yl)pyrimidine-5-carboxylate (7.1 g, 28 mmol, 70% yield) as a white solid.  $^1\text{H}$  NMR (400 MHz,  $\text{D}_2\text{O}$ )  $\delta$  8.38 (s, 1H), 3.69 (s, 2H), 1.22 (s, 6H) (exchangeable NH and  $\text{NH}_2$  protons not observed).

#### 4-Amino-2-(4,4-dimethyl-2-oxoimidazolidin-1-yl)pyrimidine-5-carbonyl chloride

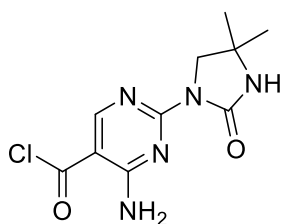

A mixture of lithium 4-amino-2-(4,4-dimethyl-2-oxoimidazolidin-1-yl)pyrimidine-5-carboxylate (6.5 g, 26 mmol, 1.0 eq) and  $\text{SOCl}_2$  (Caution! toxic; 266 g, 162 mL, 2.2 mol, 87 eq) was stirred at 60 °C for 3 h. The reaction mixture was concentrated *in vacuo* to yield 4-amino-2-(4,4-dimethyl-2-oxoimidazolidin-1-yl)pyrimidine-5-carbonyl chloride (6.9 g, 26 mmol, 99% yield) as a yellow solid which was used without further purification.

Imanixil, 4-Amino-2-(4,4-dimethyl-2-oxoimidazolidin-1-yl)-N-(3-(trifluoromethyl)phenyl)pyrimidine-5-carboxamide hydrochloride (**7**)

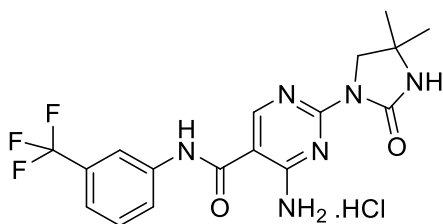

To a solution of 4-amino-2-(4,4-dimethyl-2-oxoimidazolidin-1-yl)pyrimidine-5-carbonyl chloride (6.0 g, 22 mmol, 1.0 eq) in DCM (Caution! Carcinogenic; 60 mL) was added 3-(trifluoromethyl)aniline (7.2 g, 5.6 mL, 45 mmol, 2.0 eq) dropwise, and the reaction solution was stirred at 15 °C for 0.5 h. The reaction solution was concentrated *in vacuo* and the product was recrystallised from 50 mL  $\text{H}_2\text{O}/\text{MeCN}$  (1:1) and 50 mL of petroleum ether/ethyl acetate (1:1) to yield Imanixil (**7**) (5.1 g, 13 mmol, 58% yield) as a hydrochloride salt, as a light-yellow solid. MS (ESI+)  $m/z$  calcd for  $\text{C}_{17}\text{H}_{18}\text{F}_3\text{N}_6\text{O}_2^+$   $[\text{M} + \text{H}]^+$  395.1, found 395.0.  $^1\text{H}$  NMR (300 MHz,  $\text{DMSO}-d_6$ )  $\delta$  13.04 (s, 1H), 11.33 (s, 1H), 9.24 (s, 1H), 8.79 (s, 1H), 8.68 (s, 1H), 8.64 (s, 1H), 8.22 (s, 1H), 7.97 (d,  $J = 8.4$  Hz, 1H), 7.62 (t,  $J = 8.0$  Hz, 1H), 7.50 (d,  $J = 7.8$  Hz, 1H), 3.74 (s, 2H), 1.33 (s, 6H).  $^{13}\text{C}$  NMR (75 MHz,  $\text{DMSO}-d_6$ )  $\delta$  163.28, 162.63, 155.35, 150.75, 146.55, 139.65, 130.43, 129.76 (q,  $J = 31.2$  Hz), 126.36, 124.72, 122.75, 121.01, 117.27 (q,  $J = 4.3$  Hz), 104.65, 56.02, 52.12, 28.58.  $^{19}\text{F}$  NMR (282 MHz,  $\text{DMSO}-d_6$ )  $\delta$  -61.26. UPLC analysis (method D), 3.39 min, 100% purity.



## Synthesis of N-(3-chloro-4-methoxy-phenyl)-1-(6-methyl-3-pyridyl)pyrazolo[3,4-d]pyrimidin-4-amine (27)

(E)-4,6-dichloro-5-((2-(6-methylpyridin-3-yl)hydrazineylidene)methyl)pyrimidine

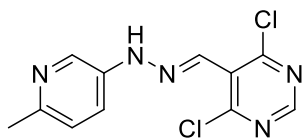

Following General Procedure 1, (6-methyl-3-pyridyl)hydrazine hydrochloride (Caution! toxic; 168 mg, 0.90 mmol) and 4,6-dichloro-5-pyrimidinecarbaldehyde (168 mg, 0.95 mmol) were stirred in DMF (Caution! Carcinogenic; 3.0 mL) overnight, yielding (E)-4,6-dichloro-5-((2-(6-methylpyridin-3-yl)hydrazineylidene)methyl)pyrimidine (200 mg, 0.71 mmol, 79% yield).

N-(3-chloro-4-methoxy-phenyl)-1-(6-methyl-3-pyridyl)pyrazolo[3,4-d]pyrimidin-4-amine (27)

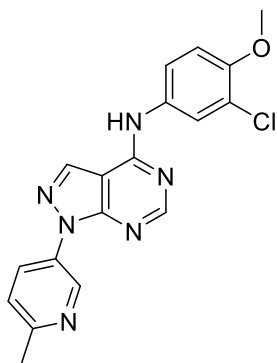

Following General Procedure 2, (E)-4,6-dichloro-5-((2-(6-methylpyridin-3-yl)hydrazineylidene)methyl)pyrimidine (100 mg, 0.35 mmol) in MeCN (3.0 mL) was stirred at 185 °C for 20 min, then 3-chloro-4-methoxyaniline (61 mg, 0.39 mmol) and DiPEA (137 mg, 0.18 mL, 1.1 mmol) were added and the mixture was stirred at 90 °C for 6 h. Purification by preparatory HPLC (elution gradient: 40-80% MeCN in H<sub>2</sub>O with 0.1% NH<sub>3</sub>) yielded N-(3-chloro-4-methoxy-phenyl)-1-(6-methyl-3-pyridyl)pyrazolo[3,4-d]pyrimidin-4-amine **27** (19 mg, 0.052 mmol, 15% yield) as a white solid. MS (ESI<sup>+</sup>) m/z calcd for C<sub>18</sub>H<sub>16</sub>ClN<sub>6</sub>O<sup>+</sup> [M + H]<sup>+</sup> 367.1, found 367.2. <sup>1</sup>H NMR (300 MHz, DMSO-*d*<sub>6</sub>) δ 10.28 (s, 1H), 9.23 (d, *J* = 2.5 Hz, 1H), 8.56 (s, 2H), 8.45 (dd, *J* = 8.4, 2.7 Hz, 1H), 8.08 (d, *J* = 2.5 Hz, 1H), 7.67 (dd, *J* = 8.9, 2.6 Hz, 1H), 7.48 (d, *J* = 8.5 Hz, 1H), 7.23 (d, *J* = 9.0 Hz, 1H), 3.88 (s, 3H), 2.55 (s, 3H). UPLC analysis (method D), 1.75 min, 100% purity.

## Synthesis of N-(3-chloro-4-methoxy-phenyl)-1-[5-(trifluoromethyl)-2-pyridyl]pyrazolo[3,4-d]

### pyrimidin-4-amine (28)

(E)-4,6-dichloro-5-((2-(5-(trifluoromethyl)pyridin-2-yl)hydrazineylidene)methyl)pyrimidine

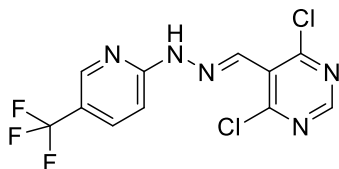

Following General Procedure 1, 2-hydrazinyl-5-(trifluoromethyl)pyridine (500 mg, 2.8 mmol) and 4,6-dichloro-5-pyrimidinecarbaldehyde (525 mg, 3.0 mmol) were stirred in DMF (Caution! Carcinogenic; 3.0 mL) overnight to yield (E)-4,6-dichloro-5-((2-(5-(trifluoromethyl)pyridin-2-yl)hydrazineylidene)methyl)pyrimidine (660 mg, 2.0 mmol, 70% yield).

N-(3-chloro-4-methoxy-phenyl)-1-[5-(trifluoromethyl)-2-pyridyl]pyrazolo[3,4-d]pyrimidin-4-amine (28)

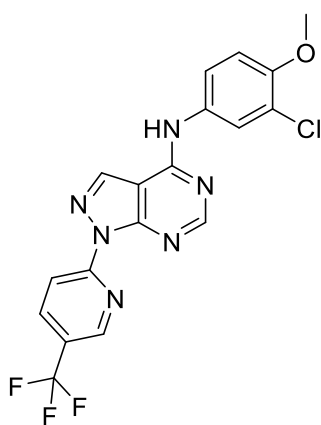

Following General Procedure 2, (E)-4,6-dichloro-5-((2-(5-(trifluoromethyl)pyridin-2-yl)hydrazineylidene)methyl)pyrimidine (100 mg, 0.29 mmol) in MeCN (4.0 mL) was heated at 185 °C for 25 min, then 3-chloro-4-methoxyaniline (51 mg, 0.38 mmol) and DiPEA (115 mg, 0.89 mmol) were added and the mixture was stirred at 85 °C overnight. Purification by preparatory HPLC (elution gradient: 40-80% MeCN in H<sub>2</sub>O with 0.1% NH<sub>3</sub>) yielded N-(3-chloro-4-methoxy-phenyl)-1-[5-(trifluoromethyl)-2-pyridyl]pyrazolo[3,4-d]pyrimidin-4-amine **28** (49 mg, 0.14 mmol, 39% yield) as a white solid. MS (ESI<sup>+</sup>) m/z calcd for C<sub>18</sub>H<sub>13</sub>ClF<sub>3</sub>N<sub>6</sub>O<sup>+</sup> [M + H]<sup>+</sup> 421.1, found 421.2. <sup>1</sup>H NMR (300 MHz, DMSO-*d*<sub>6</sub>) δ 10.30 (s, 1H), 9.06 – 8.98 (m, 1H), 8.64 – 8.40 (m, 4H),

8.07 (d,  $J = 2.4$  Hz, 1H), 7.66 (dd,  $J = 8.9, 2.6$  Hz, 1H), 7.22 (d,  $J = 9.0$  Hz, 1H), 3.88 (s, 3H). UPLC analysis (method C), 5.52 min, 100% purity.

### Synthesis of N-(3-chloro-4-methoxy-phenyl)-1-cyclopropyl-pyrazolo[3,4-d]pyrimidin-4-amine (29)

(E)-4,6-dichloro-5-((2-cyclopropylhydrazineylidene)methyl)pyrimidine

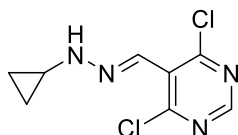

Following General Procedure 1, cyclopropylhydrazine hydrochloride (Caution! toxic; 1.0 g, 9.2 mmol) and 4,6-dichloro-5-pyrimidinecarbaldehyde (1.7 g, 9.7 mmol) were stirred in DMF (Caution! Carcinogenic; 10 mL) overnight. The crude product was purified by silica column chromatography (elution gradient: 0-100% ethyl acetate in hexane) to yield (E)-4,6-dichloro-5-((2-cyclopropylhydrazineylidene)methyl)pyrimidine (351 mg, 1.5 mmol, 17% yield) as a white powder.

N-(3-chloro-4-methoxy-phenyl)-1-cyclopropyl-pyrazolo[3,4-d]pyrimidin-4-amine (29)

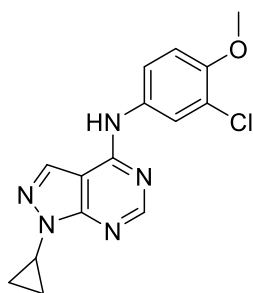

Following General Procedure 2, (E)-4,6-dichloro-5-((2-cyclopropylhydrazineylidene)methyl)pyrimidine (115 mg, 0.50 mmol) in MeCN (3.0 mL) was heated at 185 °C for 20 min, then 3-chloro-4-methoxyaniline (86 mg, 0.55 mmol) and DiPEA (193 mg, 0.26 mL, 1.5 mmol) were added and the mixture was stirred at 120 °C for 18 h. The reaction mixture was poured onto an SCX-2 cartridge, washed with DCM (Caution! Carcinogenic) and MeOH and eluted with 0.5 N methanolic ammonia. The basic fraction was concentrated *in vacuo* and further purified by preparatory HPLC (elution gradient: 20-60% MeCN in H<sub>2</sub>O with 0.1% NH<sub>3</sub>) to yield N-(3-chloro-4-methoxy-phenyl)-1-cyclopropyl-pyrazolo[3,4-d]pyrimidin-4-amine **29** (15 mg, 0.048 mmol, 10% yield) as a white solid.

MS (ESI+)  $m/z$  calcd for  $C_{15}H_{15}ClN_5O^+$   $[M + H]^+$  316.1, found 316.1.  $^1H$  NMR (300 MHz,  $DMSO-d_6$ )  $\delta$  10.03 (s, 1H), 8.43 (s, 1H), 8.15 (s, 1H), 8.06 (d,  $J = 2.5$  Hz, 1H), 7.65 (dd,  $J = 9.0, 2.6$  Hz, 1H), 7.19 (d,  $J = 9.0$  Hz, 1H), 3.86 (s, 3H), 3.32 (s, 1H), 1.24 – 1.13 (m, 2H), 1.13 – 1.04 (m, 2H). UPLC analysis (method D), 4.56 min, 96% purity.

**Synthesis of 1-(2,4-dimethylphenyl)-N-(4-methoxyphenyl)pyrazolo[3,4-d]pyrimidin-4-amine (31) and N-[3-[[1-(2,4-dimethylphenyl)pyrazolo[3,4-d]pyrimidin-4-yl]amino]phenyl]acetamide (33)**

(E)-4,6-dichloro-5-((2-(2,4-dimethylphenyl)hydrazineylidene)methyl)pyrimidine

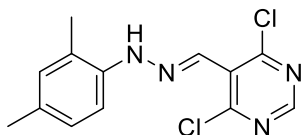

Following General Procedure 1, 2,4-dimethylphenyl hydrazine hydrochloride (Caution! toxic; 1.1 g, 6.4 mmol) and 4,6-dichloro-5-pyrimidinecarbaldehyde (1.2 g, 6.7 mmol) were stirred in DMF (Caution! Carcinogenic; 10 mL) overnight to yield (E)-4,6-dichloro-5-((2-(2,4-dimethylphenyl)hydrazineylidene)methyl)pyrimidine (1.62 g, 5.5 mmol, 86% yield).

1-(2,4-dimethylphenyl)-N-(4-methoxyphenyl)pyrazolo[3,4-d]pyrimidin-4-amine (31)

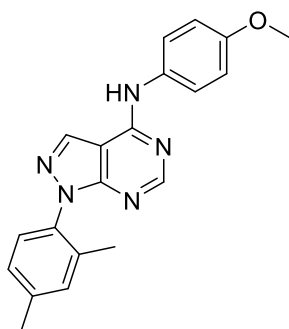

Following General Procedure 2, (E)-4,6-dichloro-5-((2-(2,4-dimethylphenyl)hydrazineylidene)methyl)pyrimidine (100 mg, 0.34 mmol) in MeCN (4.0 mL) was heated at 185 °C for 20 min, then *p*-anisidine (46 mg, 0.37 mmol) and DiPEA (131 mg, 0.18 mL, 1.0 mmol) were added and the mixture was stirred at 90 °C overnight. Purification by preparatory HPLC (elution gradient: 5-95% MeCN in

H<sub>2</sub>O with 0.1% NH<sub>3</sub>) yielded 1-(2,4-dimethylphenyl)-N-(4-methoxyphenyl)pyrazolo[3,4-d]pyrimidin-4-amine **31** (79 mg, 0.23 mmol, 68% yield) as a white solid. MS (ESI+) m/z calcd for C<sub>20</sub>H<sub>20</sub>N<sub>5</sub>O<sup>+</sup> [M + H]<sup>+</sup> 346.2, found 346.3. <sup>1</sup>H NMR (300 MHz, DMSO-*d*<sub>6</sub>) δ 10.08 (s, 1H), 8.42 (s, 1H), 8.32 (s, 1H), 7.69 (d, *J* = 8.3 Hz, 2H), 7.30 – 7.13 (m, 3H), 7.05 – 6.96 (m, 2H), 3.78 (s, 3H), 2.38 (s, 3H), 2.02 (s, 3H). UPLC analysis (method C), 5.22 min, 100% purity.

N-[3-[[1-(2,4-dimethylphenyl)pyrazolo[3,4-d]pyrimidin-4-yl]amino]phenyl]acetamide (**33**)

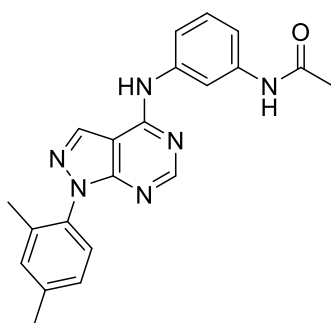

Following General Procedure 2, (E)-4,6-dichloro-5-((2-(2,4-dimethylphenyl)hydrazineylidene)methyl)pyrimidine (100 mg, 0.34 mmol) in MeCN (3.0 mL) was heated at 185 °C for 20 min, then N-(3-aminophenyl)acetamide (56 mg, 0.37 mmol) and DiPEA (131 mg, 0.18 mL, 1.0 mmol) were added and the mixture stirred at 120 °C overnight. Purification by preparatory HPLC (elution gradient: 40-80% MeCN in H<sub>2</sub>O with 0.1% NH<sub>3</sub>) yielded N-[3-[[1-(2,4-dimethylphenyl)pyrazolo[3,4-d]pyrimidin-4-yl]amino]phenyl]acetamide **33** (55 mg, 0.15 mmol, 44% yield) as a white solid. MS (ESI+) m/z calcd for C<sub>21</sub>H<sub>21</sub>N<sub>6</sub>O<sup>+</sup> [M + H]<sup>+</sup> 373.2, found 373.3. <sup>1</sup>H NMR (300 MHz, DMSO-*d*<sub>6</sub>) δ 10.22 (s, 1H), 10.03 (s, 1H), 8.51 (s, 1H), 8.39 (s, 1H), 8.16 (s, 1H), 7.68 – 7.59 (m, 1H), 7.36 – 7.24 (m, 4H), 7.21 – 7.16 (m, 1H), 2.38 (s, 3H), 2.07 (s, 3H), 2.03 (s, 3H). UPLC analysis (method C), 4.54 min, 99% purity.

## Synthesis of **34** and **35** from (E)-4,6-dichloro-5-((2-(3,4-dimethylphenyl)hydrazineylidene)methyl)pyrimidine

### pyrimidine

(E)-4,6-dichloro-5-((2-(3,4-dimethylphenyl)hydrazineylidene)methyl)pyrimidine

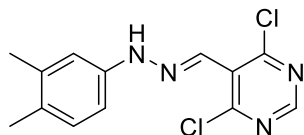

Following General Procedure 1, 3,4-dimethylphenyl hydrazine hydrochloride (Caution! toxic; 1.0 g, 5.8 mmol) and 4,6-dichloro-5-pyrimidinecarbaldehyde (1.08 g, 6.1 mmol) were stirred in DMF (Caution! Carcinogenic; 10 mL) overnight to yield (E)-4,6-dichloro-5-((2-(3,4-dimethylphenyl)hydrazineylidene)methyl)pyrimidine (1.5 g, 5.1 mmol, 88% yield).

1-(3,4-Dimethylphenyl)-N-(6-methoxy-3-pyridyl)pyrazolo[3,4-d]pyrimidin-4-amine (**34**)

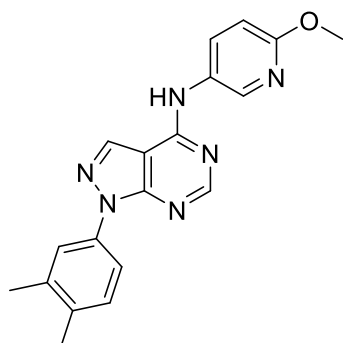

Following General Procedure 2, (E)-4,6-dichloro-5-((2-(3,4-dimethylphenyl)hydrazineylidene)methyl)pyrimidine (100 mg, 0.34 mmol) in MeCN (4.0 mL) was heated at 185 °C for 20 min, then 6-methoxypyridin-3-amine (46 mg, 0.37 mmol) and DiPEA (131 mg, 0.18 mL, 1.0 mmol) were added and the mixture was heated at 110 °C for 48 h. Purification by preparatory HPLC (elution gradient: 40-80% MeCN in H<sub>2</sub>O with 0.1% NH<sub>3</sub>) yielded 1-(3,4-dimethylphenyl)-N-(6-methoxy-3-pyridyl)pyrazolo[3,4-d]pyrimidin-4-amine **34** (17 mg, 0.049 mmol, 14% yield) as a white solid. MS (ESI+) *m/z* calcd for C<sub>19</sub>H<sub>19</sub>N<sub>6</sub>O<sup>+</sup> [M + H]<sup>+</sup> 347.2, found 347.3. <sup>1</sup>H NMR (300 MHz, DMSO-*d*<sub>6</sub>) δ 10.25 (s, 1H), 8.52 (s, 1H), 8.50 (d, *J* = 7.5 Hz, 1H), 8.14 (dd, *J* = 8.9, 2.8 Hz, 1H), 8.00 – 7.85 (m, 2H), 7.32 (d, *J* = 8.2 Hz, 1H), 6.91 (dd, *J* = 8.8, 0.7 Hz, 1H), 3.88 (s, 3H), 2.33 (s, 3H), 2.29 (s, 3H) (exchangeable NH proton not observed). UPLC analysis (method C), 5.47 min, 98% purity.

N-(5-chloro-6-methoxy-3-pyridyl)-1-(3,4-dimethylphenyl)pyrazolo[3,4-d]pyrimidin-4-amine (**35**)

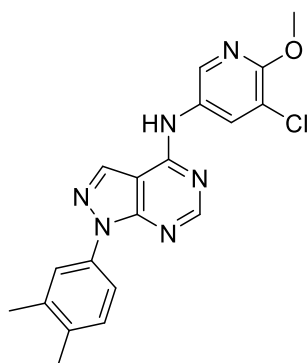

A microwave vial was charged with (E)-4,6-dichloro-5-((2-(3,4-dimethylphenyl)hydrazineylidene)methyl)pyrimidine (100 mg, 0.34 mmol), dissolved in MeCN (4.0 mL) and heated at 185 °C for 20 min. The reaction was cooled to rt and 5-chloro-6-methoxypyridin-3-amine (59 mg, 0.37 mmol) and DiPEA (131 mg, 1.0 mmol) were added. The mixture was then sealed and heated at 110 °C for 48 h. Upon cooling to rt the reaction mixture was concentrated *in vacuo* and purified by preparatory HPLC (elution gradient: 40-80% MeCN in H<sub>2</sub>O with 0.1% NH<sub>3</sub>) to yield N-(5-chloro-6-methoxy-3-pyridyl)-1-(3,4-dimethylphenyl)pyrazolo[3,4-d]pyrimidin-4-amine **35** (23 mg, 0.060 mmol, 18% yield) as a white solid. MS (ESI+) *m/z* calcd for C<sub>19</sub>H<sub>18</sub>ClN<sub>6</sub>O<sup>+</sup> [M + H]<sup>+</sup> 381.1, found 381.3. <sup>1</sup>H NMR (300 MHz, DMSO-*d*<sub>6</sub>) δ 10.39 (s, 1H), 8.58 – 8.44 (m, 4H), 7.97 – 7.87 (m, 2H), 7.32 (d, *J* = 8.3 Hz, 1H), 3.97 (s, 3H), 2.33 (s, 3H), 2.29 (s, 3H). UPLC analysis (method D), 6.56 min, 98% purity.

**Synthesis of N-(3-chloro-4-methoxy-phenyl)-7-(3,4-dimethylphenyl)pyrrolo[2,3-d]pyrimidin-4-amine (36)**

N-(3-chloro-4-methoxy-phenyl)-7H-pyrrolo[2,3-d]pyrimidin-4-amine

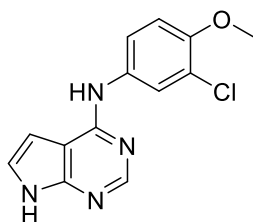

A microwave vial was charged with 6-chloro-7-deazapurine (500 mg, 3.3 mmol), 3-chloro-4-methoxyaniline (770 mg, 4.9 mmol) and DiPEA (631 mg, 4.9 mmol), dissolved in 1-butanol (5.0 mL) and heated at 130 °C for 40 h. Upon cooling to rt the reaction mixture was concentrated *in vacuo* and purified by silica gel chromatography

(elution gradient: 0-20% MeOH in DCM; Caution! Carcinogenic) to yield N-(3-chloro-4-methoxy-phenyl)-7H-pyrrolo[2,3-d]pyrimidin-4-amine (267 mg, 0.97 mmol, 30% yield) as a white solid. MS (ESI+) m/z calcd for  $C_{13}H_{12}ClN_4O^+$  [M + H]<sup>+</sup> 275.1, found 275.1. UPLC analysis (method A), 2.59 min.

N-(3-chloro-4-methoxy-phenyl)-7-(3,4-dimethylphenyl)pyrrolo[2,3-d]pyrimidin-4-amine (**36**)

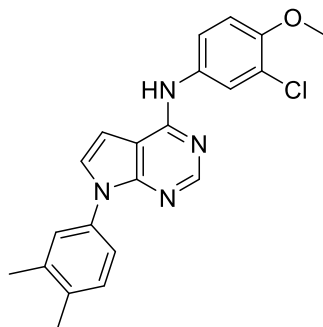

A microwave vial was charged with N-(3-chloro-4-methoxy-phenyl)-7H-pyrrolo[2,3-d]pyrimidin-4-amine (75 mg, 0.27 mmol), 4-iodo-*o*-xylene (76 mg, 0.33 mmol), potassium phosphate tribasic (127 mg, 0.60 mmol), *trans* N,N'-dimethylcyclohexane-1,2-diamine (5.8 mg, 0.041 mmol) and copper(I) iodide (3.6 mg 0.019 mmol), dissolved in 1,4-dioxane (Caution! Carcinogenic; 3.0 mL), sealed and heated at 100 °C for 18 h. Upon cooling to rt the reaction mixture was poured onto an SCX-2 cartridge, washed with DCM (Caution! Carcinogenic) and methanol, then eluted with 0.5 N methanolic ammonia. The basic fraction was concentrated *in vacuo* and purified by preparatory HPLC (elution gradient: 40-80% MeCN in H<sub>2</sub>O with 0.1% NH<sub>3</sub>) to yield N-(3-chloro-4-methoxy-phenyl)-7-(3,4-dimethylphenyl)pyrrolo[2,3-d]pyrimidin-4-amine **36** (36 mg, 0.095 mmol, 34% yield) as a white solid. MS (ESI+) m/z calcd for  $C_{21}H_{20}ClN_4O^+$  [M + H]<sup>+</sup> 379.1, found 379.2. <sup>1</sup>H NMR (300 MHz, DMSO-*d*<sub>6</sub>) δ 9.47 (s, 1H), 8.36 (s, 1H), 8.11 (d, *J* = 2.6 Hz, 1H), 7.72 (dd, *J* = 9.0, 2.6 Hz, 1H), 7.65 (d, *J* = 3.7 Hz, 1H), 7.59 (d, *J* = 2.0 Hz, 1H), 7.52 (dd, *J* = 8.2, 2.3 Hz, 1H), 7.29 (d, *J* = 8.3 Hz, 1H), 7.17 (d, *J* = 9.1 Hz, 1H), 6.97 (d, *J* = 3.7 Hz, 1H), 3.85 (s, 3H), 2.31 (s, 3H), 2.28 (s, 3H). <sup>13</sup>C NMR (75 MHz, DMSO) δ 153.75, 151.56, 149.99, 149.43, 137.23, 135.44, 134.62, 133.84, 130.02, 125.01, 124.49, 122.11, 120.91, 120.43, 120.32, 112.88, 104.58, 100.04, 56.22, 19.60, 18.98. UPLC analysis (method C), 6.27 min, 100% purity.



### Synthesis of N-(3-chloro-4-methoxy-phenyl)-1-(3,4-dimethylphenyl)pyrrolo[3,2-c]pyridin-4-amine (37)

4-chloro-1-(3,4-dimethylphenyl)pyrrolo[3,2-c]pyridine

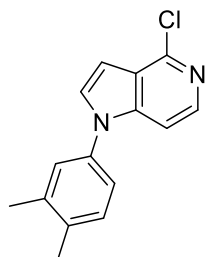

A microwave vial was charged with 4-chloro-1H-pyrrolo[3,2-c]pyridine (200 mg, 1.3 mmol), 4-iodo-*o*-xylene (335 mg, 1.4 mmol), potassium phosphate tribasic (611 mg, 2.9 mmol), *trans* N,N'-dimethylcyclohexane-1,2-diamine (37 mg, 0.26 mmol) and copper(I) iodide (25 mg, 0.13 mmol), dissolved in 1,4-dioxane (Caution! Carcinogenic; 4.0 mL), sealed and heated at 120 °C for 18 h. Upon cooling to rt the reaction mixture was concentrated *in vacuo* and purified by silica gel chromatography (elution gradient: 0-50% ethyl acetate in hexane) to yield 4-chloro-1-(3,4-dimethylphenyl)pyrrolo[3,2-c]pyridine (185 mg, 0.72 mmol, 55% yield) as a white solid. MS (ESI+) *m/z* calcd for C<sub>15</sub>H<sub>14</sub>ClN<sub>2</sub><sup>+</sup> [M + H]<sup>+</sup> 257.1, found 257.1. UPLC analysis (method A), 3.51 min.

N-(3-chloro-4-methoxy-phenyl)-1-(3,4-dimethylphenyl)pyrrolo[3,2-c]pyridin-4-amine (37)

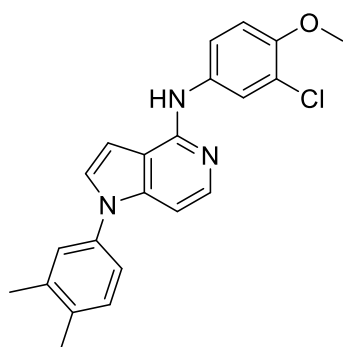

A microwave vial was charged with 4-chloro-1-(3,4-dimethylphenyl)pyrrolo[3,2-c]pyridine (80 mg, 0.31 mmol), 3-chloro-4-methoxyaniline (59 mg, 0.31 mmol) and 4 N HCl in dioxane (Caution! Carcinogenic; 0.078 mL, 0.31 mmol), dissolved in 1,4-dioxane (Caution! Carcinogenic; 3.0 mL) and heated at 120 °C for 42 h. Upon cooling to rt the reaction mixture was concentrated *in vacuo* and purified by preparatory HPLC (elution gradient: 50-90% MeCN in H<sub>2</sub>O with 0.1% NH<sub>3</sub>) to yield N-(3-chloro-4-methoxy-phenyl)-1-(3,4-dimethylphenyl)pyrrolo[3,2-c]pyridin-4-amine **37** (75 mg, 0.20 mmol, 64 % yield) as a white solid. MS (ESI+) *m/z* calcd for C<sub>22</sub>H<sub>21</sub>ClN<sub>3</sub>O<sup>+</sup>

[M + H]<sup>+</sup> 378.1, found 378.2. <sup>1</sup>H NMR (300 MHz, DMSO-*d*<sub>6</sub>) δ 8.82 (s, 1H), 8.19 (d, *J* = 2.6 Hz, 1H), 7.87 – 7.72 (m, 2H), 7.53 (d, *J* = 3.3 Hz, 1H), 7.39 – 7.22 (m, 3H), 7.16 – 7.07 (m, 2H), 6.92 (dd, *J* = 6.0, 0.8 Hz, 1H), 3.82 (s, 3H), 2.32 (s, 3H), 2.30 (s, 3H) UPLC analysis (method C), 6.84 min, 97% purity.

### Synthesis of N-(3-chloro-4-methoxy-phenyl)-1-(3,4-dimethylphenyl)pyrrolo[2,3-b]pyridin-4-amine (38)

4-Chloro-1-(3,4-dimethylphenyl)pyrrolo[2,3-b]pyridine

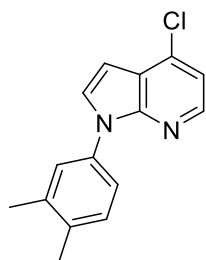

A microwave vial was charged with 4-chloro-1H-pyrrolo[2,3-b]pyridine (500 mg, 3.3 mmol), 4-iodo-*o*-xylene (907 mg, 3.9 mmol), potassium phosphate tribasic (1.5 g, 7.2 mmol), *trans* N,N'-dimethylcyclohexane-1,2-diamine (46 mg, 0.33 mmol), copper(I) iodide (43 mg, 0.23 mmol) and 1,4-dioxane (Caution! Carcinogenic; 10 mL), sealed and heated at 120 °C for 18 h. Upon cooling rt the reaction mixture was concentrated *in vacuo* and purified by silica gel chromatography (elution gradient: 0-50% ethyl acetate in hexane) to yield 4-chloro-1-(3,4-dimethylphenyl)pyrrolo[2,3-b]pyridine (815 mg, 3.2 mmol, 97% yield) as a white solid. MS (ESI<sup>+</sup>) *m/z* calcd for C<sub>22</sub>H<sub>21</sub>ClN<sub>3</sub>O<sup>+</sup> [M + H]<sup>+</sup> 257.1, found 257.1. UPLC analysis (method A), 3.67 min.

N-(3-chloro-4-methoxy-phenyl)-1-(3,4-dimethylphenyl)pyrrolo[2,3-b]pyridin-4-amine (**38**)

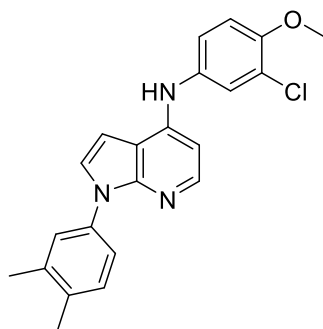

A microwave vial was charged with 4-chloro-1-(3,4-dimethylphenyl)pyrrolo[2,3-b]pyridine (100 mg, 0.39 mmol), 3-chloro-4-methoxyaniline (77 mg, 0.49 mmol), Xantphos (23 mg, 0.039 mmol), tris(dibenzylideneacetone)dipalladium(0) (18 mg, 0.019 mmol), Cs<sub>2</sub>CO<sub>3</sub> (277 mg, 0.86 mmol) and 1,4-dioxane (Caution! Carcinogenic; 3.0 mL), sealed and degassed with bubbling nitrogen for 5 min. The reaction was heated at 125 °C for 75 min. Upon cooling to rt the reaction mixture was poured onto an SCX-2 cartridge, washed with DCM (Caution! Carcinogenic) and methanol, and eluted with 0.5 N methanolic ammonia. The basic fraction was concentrated *in vacuo* and purified by preparatory HPLC (elution gradient: 5-95% MeCN in H<sub>2</sub>O with 0.1% NH<sub>3</sub>) to yield N-(3-chloro-4-methoxy-phenyl)-1-(3,4-dimethylphenyl)pyrrolo[2,3-b]pyridin-4-amine **38** (28 mg, 0.074 mmol, 19% yield) as a white solid. MS (ESI+) *m/z* calcd for C<sub>22</sub>H<sub>21</sub>ClN<sub>3</sub>O<sup>+</sup> [M + H]<sup>+</sup> 378.1, found 378.2. <sup>1</sup>H NMR (300 MHz, DMSO-*d*<sub>6</sub>) δ 8.70 (s, 1H), 7.96 (d, *J* = 5.5 Hz, 1H), 7.59 (ddd, *J* = 13.8, 7.5, 2.3 Hz, 3H), 7.36 (d, *J* = 2.5 Hz, 1H), 7.32 – 7.23 (m, 2H), 7.18 (d, *J* = 8.9 Hz, 1H), 6.81 (d, *J* = 3.7 Hz, 1H), 6.62 (d, *J* = 5.5 Hz, 1H), 3.87 (s, 3H), 2.30 (s, 3H), 2.27 (s, 3H). UPLC analysis (method C), 6.52 min, 97% purity.

**Synthesis of 4-(3-chloro-4-methoxy-anilino)-7-(3,4-dimethylphenyl)-5H-pyrrolo[2,3-d]pyrimidin-6-one (39)**

4-chloro-7-(3,4-dimethylphenyl)-5H-pyrrolo[2,3-d]pyrimidin-6-one

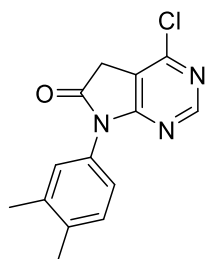

A microwave vial was charged with methyl (4,6-dichloro-5-pyrimidinyl)acetate (750 mg, 3.4 mmol), 3,4-dimethylaniline (452 mg, 3.7 mmol) and DiPEA (1.17 g, 1.58 mL, 10 mmol), dissolved in MeCN (8.0 mL) and heated at 170 °C for 90 min. Upon cooling to rt the reaction mixture was concentrated *in vacuo* and purified by silica gel chromatography (elution gradient: 0-35% ethyl acetate in hexane) to yield 4-chloro-7-(3,4-dimethylphenyl)-5H-pyrrolo[2,3-d]pyrimidin-6-one (225 mg, 0.82 mmol, 24% yield) as a white solid. MS (ESI+)  $m/z$  calcd for  $C_{14}H_{13}ClN_3O^+$  [M + H]<sup>+</sup> 274.1, found 274.1. UPLC analysis (method A), 2.48 min.

4-(3-chloro-4-methoxy-anilino)-7-(3,4-dimethylphenyl)-5H-pyrrolo[2,3-d]pyrimidin-6-one (**39**)

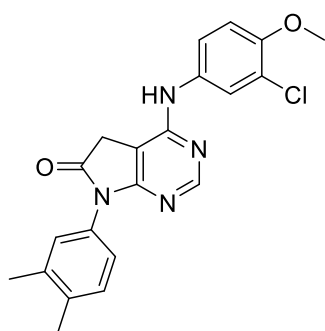

A microwave vial was charged with 4-chloro-7-(3,4-dimethylphenyl)-5H-pyrrolo[2,3-d]pyrimidin-6-one (90 mg, 0.33 mmol), 3-chloro-4-methoxyaniline (57 mg, 0.36 mmol), 4-methylbenzenesulfonic acid (5.7 mg, 0.033 mmol), NMP (1.0 mL) and diglyme (1.0 mL), sealed and heated at 180 °C for 2 h. Upon cooling to rt the reaction mixture was poured into H<sub>2</sub>O, extracted with DCM (Caution! Carcinogenic; 3 x 20 mL), dried (Na<sub>2</sub>SO<sub>4</sub>), filtered, concentrated *in vacuo* and purified by preparatory HPLC (elution gradient: 30-70% MeCN in H<sub>2</sub>O with 0.1% NH<sub>3</sub>) to yield 4-(3-chloro-4-methoxy-anilino)-7-(3,4-dimethylphenyl)-5H-pyrrolo[2,3-d]pyrimidin-6-one **39** (51 mg, 0.13 mmol, 39% yield) as a white solid. MS (ESI+)  $m/z$  calcd for  $C_{21}H_{20}ClN_4O_2^+$  [M + H]<sup>+</sup> 395.1, found 395.3. <sup>1</sup>H NMR (300 MHz, DMSO-*d*<sub>6</sub>) δ 9.04 (s, 1H), 8.32 (s, 1H), 7.87 (d, *J* = 2.6 Hz, 1H), 7.54 (dd, *J* = 9.0, 2.6 Hz, 1H), 7.26 (d, *J* = 8.1 Hz, 1H), 7.19 – 7.09 (m, 3H), 3.84 (s, 3H), 3.67 – 3.60 (m, 2H), 2.27 (s, 3H), 2.26 (s, 3H). UPLC analysis (method D), 5.57 min, 100% purity.

**Synthesis of N-(3-chloro-4-methoxyphenyl)-7-(3,4-dimethylphenyl)-5-methyl-7H-pyrrolo[2,3-d]pyrimidin-4-amine (40)**

4-chloro-7-(3,4-dimethylphenyl)-5-methyl-pyrrolo[2,3-d]pyrimidine

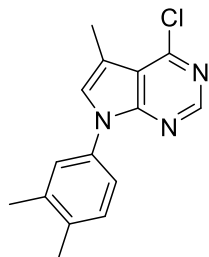

To a stirred solution of 4-chloro-5-methyl-1H-pyrrolo[2,3-d]pyrimidine (200 mg, 1.2 mmol), CuI (23 mg, 0.12 mmol), 4-iodo-*o*-xylene (305 mg, 0.19 mL, 1.3 mmol) and K<sub>3</sub>PO<sub>4</sub> tribasic anhydrous (557 mg, 2.6 mmol) in 1,4-dioxane (Caution! Carcinogenic; 4.0 mL) was added *trans* N,N'-dimethylcyclohexane-1,2-diamine (34 mg, 0.038 mL, 0.24 mmol) and the reaction sealed under nitrogen and heated at 120 °C overnight. The reaction was filtered, concentrated *in vacuo* and purified by silica column chromatography (elution gradient: 0-40% ethyl acetate in hexane) to yield 4-chloro-7-(3,4-dimethylphenyl)-5-methyl-pyrrolo[2,3-d]pyrimidine (136 mg, 0.50 mmol, 42% yield). MS (ESI+) *m/z* calcd for C<sub>15</sub>H<sub>15</sub>ClN<sub>3</sub><sup>+</sup> [M + H]<sup>+</sup> 272.1, found 272.1. UPLC analysis (method A), 3.51 min.

N-(3-chloro-4-methoxyphenyl)-7-(3,4-dimethylphenyl)-5-methyl-7H-pyrrolo[2,3-d]pyrimidin-4-amine (40)

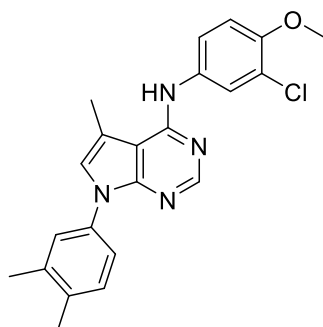

4-Chloro-7-(3,4-dimethylphenyl)-5-methyl-pyrrolo[2,3-d]pyrimidine (70 mg, 0.26 mmol), 3-chloro-4-methoxyaniline (49 mg, 0.31 mmol), DiPEA (100 mg, 0.13 mL, 0.77 mmol) and 4 N/1,4-dioxane (Caution! Carcinogenic; 0.065 mL, 0.26 mmol) in 1,4-dioxane (Caution! Carcinogenic; 3.0 mL) were sealed in a reaction vial and heated at 100 °C overnight. The reaction was opened and heated at 60 °C for 30 min to release the HCl before being basified with ammonia in methanol and concentrating *in vacuo*. The residue was further purified by

preparatory HPLC (elution gradient: 50-90% MeCN in H<sub>2</sub>O with 0.1% NH<sub>3</sub>) to yield N-(3-chloro-4-methoxyphenyl)-7-(3,4-dimethylphenyl)-5-methyl-7H-pyrrolo[2,3-d]pyrimidin-4-amine **40** (52 mg, 0.13 mmol, 51% yield). MS (ESI+) m/z calcd for C<sub>22</sub>H<sub>22</sub>ClN<sub>4</sub>O<sup>+</sup> [M + H]<sup>+</sup> 393.1, found 393.3. <sup>1</sup>H NMR (300 MHz, DMSO-*d*<sub>6</sub>) δ 8.26 (s, 1H), 8.15 (s, 1H), 7.85 (d, *J* = 2.6 Hz, 1H), 7.63 (dd, *J* = 8.9, 2.6 Hz, 1H), 7.57 (d, *J* = 2.0 Hz, 1H), 7.50 (dd, *J* = 8.1, 2.3 Hz, 1H), 7.43 (d, *J* = 1.1 Hz, 1H), 7.27 (d, *J* = 8.3 Hz, 1H), 7.15 (d, *J* = 9.0 Hz, 1H), 3.85 (s, 3H), 2.56 (d, *J* = 1.1 Hz, 3H), 2.29 (s, 3H), 2.27 (s, 3H). UPLC analysis (method C), 6.79 min, 100% purity.

### Synthesis of N-(3-chloro-4-methoxyphenyl)-7-(2,4-dimethylphenyl)-7H-pyrrolo[2,3-d]pyrimidin-4-amine (**41**)

N-(3-chloro-4-methoxy-phenyl)-7H-pyrrolo[2,3-d]pyrimidin-4-amine

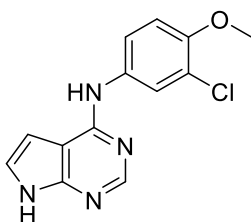

6-Chloro-7-deazapurine (500 mg, 3.3 mmol), 3-chloro-4-methoxyaniline (770 mg, 4.9 mmol) and DiPEA (631 mg, 0.84 mL, 4.9 mmol) were sealed in a reaction vial and the reaction heated at 120 °C overnight, followed by heating at 130 °C for a further 18 h. The reaction was concentrated *in vacuo* and purified by column chromatography (elution gradient: 0-20% MeOH in DCM; Caution! Carcinogenic) to yield N-(3-chloro-4-methoxy-phenyl)-7H-pyrrolo[2,3-d]pyrimidin-4-amine (267 mg, 0.97 mmol, 30% yield). MS (ESI+) m/z calcd for C<sub>13</sub>H<sub>12</sub>ClN<sub>4</sub>O<sup>+</sup> [M + H]<sup>+</sup> 275.1, found 275.1. UPLC analysis (method A), 2.56 min.

N-(3-chloro-4-methoxyphenyl)-7-(2,4-dimethylphenyl)-7H-pyrrolo[2,3-d]pyrimidin-4-amine (**41**)

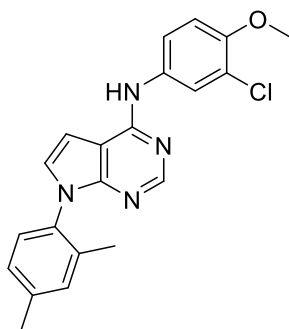

To a stirred solution of N-(3-chloro-4-methoxy-phenyl)-7H-pyrrolo[2,3-d]pyrimidin-4-amine (100 mg, 0.36 mmol), CuI (4.8 mg, 0.025 mmol), 4-iodo-*m*-xylene (106 mg, 0.065 mL, 0.46 mmol) and K<sub>3</sub>PO<sub>4</sub> tribasic anhydrous (170 mg, 0.80 mmol) in 1,4-dioxane (Caution! Carcinogenic; 3.0 mL) was added *trans* N,N'-dimethylcyclohexane-1,2-diamine (7.8 mg, 8.6 μL, 0.055 mmol) and the reaction was sealed under nitrogen and heated at 130 °C for 72 h. Further *trans* N,N'-dimethylcyclohexane-1,2-diamine (52 mg, 57 μL, 0.37 mmol) and CuI (35 mg, 0.18 mmol) were added and the reaction stirred at 150 °C for 72 h. The reaction mixture was applied to an SCX-2 cartridge, washed with DCM (Caution! Carcinogenic) and MeOH and eluted with 2 M methanolic ammonia. The basic fraction was concentrated *in vacuo*, then purified by preparatory HPLC (elution gradient: 40-80% MeCN in H<sub>2</sub>O with 0.1% NH<sub>3</sub>) to yield N-(3-chloro-4-methoxyphenyl)-7-(2,4-dimethylphenyl)-7H-pyrrolo[2,3-d]pyrimidin-4-amine **41** (34 mg, 0.089 mmol, 24% yield). MS (ESI+) *m/z* calcd for C<sub>21</sub>H<sub>20</sub>ClN<sub>4</sub>O<sup>+</sup> [M + H]<sup>+</sup> 379.1, found 379.3. <sup>1</sup>H NMR (300 MHz, Chloroform-*d*) δ 8.42 (s, 1H), 7.66 (d, *J* = 2.6 Hz, 1H), 7.47 (dd, *J* = 8.8, 2.6 Hz, 1H), 7.31 (s, 1H), 7.21 – 7.07 (m, 3H), 7.02 – 6.93 (m, 2H), 6.17 (d, *J* = 3.6 Hz, 1H), 3.94 (s, 3H), 2.38 (s, 3H), 2.04 (s, 3H). UPLC analysis (method C), 6.06 min, 98% purity.

**Synthesis of N-(3-chloro-4-methoxyphenyl)-7-(4-methoxyphenyl)-7H-pyrrolo[2,3-d]pyrimidin-4-amine (42)**

4-chloro-7-(4-methoxyphenyl)pyrrolo[2,3-d]pyrimidine

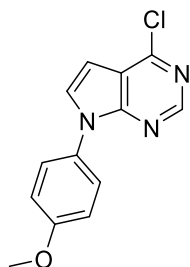

To a stirred solution of 6-chloro-7-deazapurine (500 mg, 3.3 mmol), CuI (43 mg, 0.23 mmol), 4-iodophenyl methyl ether (952 mg, 0.58 mL, 4.1 mmol) and  $K_3PO_4$  tribasic anhydrous (1520 mg, 7.2 mmol) in 1,4-dioxane (Caution! Carcinogenic; 10 mL) was added *trans* N,N'-dimethylcyclohexane-1,2-diamine (70 mg, 0.077 mL, 0.49 mmol) and the reaction was sealed under nitrogen and heated at 120 °C overnight. The reaction was filtered and concentrated *in vacuo*, then purified by silica column chromatography (elution gradient: 0-50% ethyl acetate in hexane) to yield 4-chloro-7-(4-methoxyphenyl)pyrrolo[2,3-d]pyrimidine (640 mg, 2.5 mmol, 76% yield). MS (ESI+)  $m/z$  calcd for  $C_{13}H_{11}ClN_4O^+$  [M + H]<sup>+</sup> 260.1, found 260.1. UPLC analysis (method A), 3.04 min.

N-(3-chloro-4-methoxyphenyl)-7-(4-methoxyphenyl)-7H-pyrrolo[2,3-d]pyrimidin-4-amine (42)

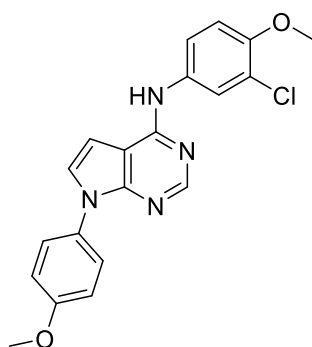

A mixture of 4-chloro-7-(4-methoxyphenyl)pyrrolo[2,3-d]pyrimidine (100 mg, 0.39 mmol), 3-chloro-4-methoxyaniline (67 mg, 0.42 mmol),  $Cs_2CO_3$  (274 mg, 0.85 mmol),  $Pd_2(dba)_3$  (18 mg, 0.019 mmol) and Xantphos (22 mg, 0.039 mmol) in 1,4-dioxane (Caution! Carcinogenic; 10 mL) was sealed in a microwave tube and degassed with nitrogen for 5 min. The reaction was heated in a microwave at 125 °C for 30 min. The reaction



mixture was filtered through a small pad of silica, concentrated *in vacuo* and purified by preparatory HPLC (elution gradient: 50-90% MeCN in H<sub>2</sub>O with 0.1% NH<sub>3</sub>) to yield N-(3-chloro-4-methoxyphenyl)-7-(4-methoxyphenyl)-7H-pyrrolo[2,3-d]pyrimidin-4-amine **42** (39 mg, 0.10 mmol, 27% yield). MS (ESI+) *m/z* calcd for C<sub>20</sub>H<sub>18</sub>ClN<sub>4</sub>O<sub>2</sub><sup>+</sup> [M + H]<sup>+</sup> 381.1, found 381.2. <sup>1</sup>H NMR (300 MHz, DMSO-*d*<sub>6</sub>) δ 9.47 (s, 1H), 8.34 (s, 1H), 8.11 (d, *J* = 2.6 Hz, 1H), 7.78 – 7.65 (m, 3H), 7.63 – 7.58 (m, 1H), 7.13 (dd, *J* = 21.4, 9.0 Hz, 3H), 6.96 (d, *J* = 3.7 Hz, 1H), 3.89 – 3.76 (m, 6H). UPLC analysis (method C), 5.61 min, 99% purity.

### Synthesis of **43**, **44**, **45** and **46** from 4-chloro-7-(3,4-dimethylphenyl)pyrrolo[2,3-d]pyrimidine

4-chloro-7-(3,4-dimethylphenyl)pyrrolo[2,3-d]pyrimidine

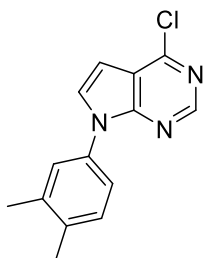

To a stirred solution of 6-chloro-7-deazapurine (1.0 g, 6.5 mmol), CuI (87 mg, 0.46 mmol), 4-iodo-*o*-xylene (1.9 g, 1.2 mL, 8.1 mmol) and K<sub>3</sub>PO<sub>4</sub> tribasic anhydrous (3.0 mg, 14 mmol) in 1,4-dioxane (Caution! Carcinogenic; 10 mL) was added *trans* N,N'-dimethylcyclohexane-1,2-diamine (139 mg, 0.15 mL, 0.98 mmol) and the reaction was sealed under a nitrogen atmosphere and heated at 110 °C for 48 h. The reaction mixture was filtered, concentrated *in vacuo* and purified by silica column chromatography (elution gradient: 0-40% ethyl acetate in hexane) to yield 4-chloro-7-(3,4-dimethylphenyl)pyrrolo[2,3-d]pyrimidine (1.1 g, 4.4 mmol, 67% yield). MS (ESI+) *m/z* calcd for C<sub>14</sub>H<sub>13</sub>ClN<sub>3</sub><sup>+</sup> [M + H]<sup>+</sup> 258.1, found 258.1. UPLC analysis (method A), 3.36 min,

N-(3-((7-(3,4-dimethylphenyl)-7H-pyrrolo[2,3-d]pyrimidin-4-yl)amino)phenyl)acetamide (**43**)

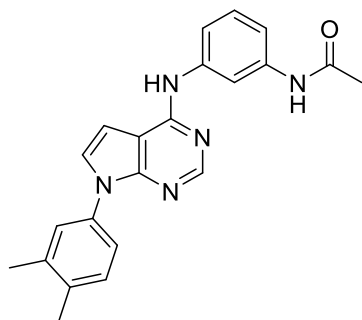

A microwave vial was charged with N-(3-aminophenyl)acetamide (61 mg, 0.41 mmol), 4-chloro-7-(3,4-dimethylphenyl)pyrrolo[2,3-d]pyrimidine (100 mg, 0.39 mmol) and DCE (Caution! Possible arcinogen; 3.0 mL) and the vial was sealed under a nitrogen atmosphere. The reaction was heated at 130 °C for 3 h, then at 135 °C for a further 3 h. The reaction was concentrated *in vacuo* and purified by preparatory HPLC (elution gradient: 30-70% MeCN in H<sub>2</sub>O with 0.1% NH<sub>3</sub>) to yield N-(3-((7-(3,4-dimethylphenyl)-7H-pyrrolo[2,3-d]pyrimidin-4-yl)amino)phenyl)acetamide **43** (54 mg, 0.14 mmol, 37% yield). MS (ESI+) *m/z* calcd for C<sub>22</sub>H<sub>22</sub>N<sub>5</sub>O<sup>+</sup> [M + H]<sup>+</sup> 372.2, found 372.3. <sup>1</sup>H NMR (300 MHz, DMSO-*d*<sub>6</sub>) δ 9.96 (s, 1H), 9.50 (s, 1H), 8.36 (s, 1H), 8.16 (d, *J* = 2.0 Hz, 1H), 7.65 (d, *J* = 3.7 Hz, 1H), 7.63-7.58 (m, 2H), 7.53 (dd, *J* = 8.1, 2.3 Hz, 1H), 7.29 (d, *J* = 8.2 Hz, 1H), 7.28 – 7.22 (m, 2H), 7.06 (d, *J* = 3.7 Hz, 1H), 2.31 (s, 3H), 2.28 (s, 3H), 2.06 (s, 3H). UPLC analysis (method C), 5.13 min, 100% purity.

Synthesis of N-(4-((7-(3,4-dimethylphenyl)-7H-pyrrolo[2,3-d]pyrimidin-4-yl)amino)phenyl)acetamide (**44**)

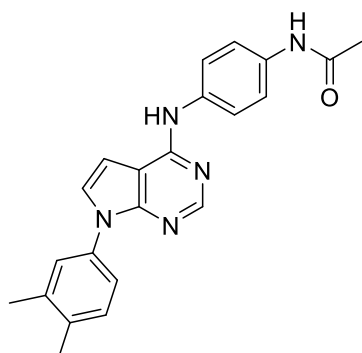

A stirred mixture of 4-chloro-7-(3,4-dimethylphenyl)pyrrolo[2,3-d]pyrimidine (30 mg, 0.12 mmol), 4'-aminoacetanilide (22 mg, 0.15 mmol), Cs<sub>2</sub>CO<sub>3</sub> (83 mg, 0.26 mmol), Pd<sub>2</sub>(dba)<sub>3</sub> (5.3 mg, 0.0058 mmol), and Xantphos (6.7 mg, 0.012 mmol) in 1,4-dioxane (Caution! Carcinogenic; 3.0 mL) was sealed in a microwave tube

and degassed with nitrogen for 5 min. The reaction was heated in a microwave at 125 °C for 30 min. The reaction was filtered through a small pad of silica, concentrated *in vacuo* and purified by preparatory HPLC (elution gradient: 40-80% MeCN in H<sub>2</sub>O with 0.1% NH<sub>3</sub>) to yield N-(4-((7-(3,4-dimethylphenyl)-7H-pyrrolo[2,3-d]pyrimidin-4-yl)amino)phenyl)acetamide **44** (15 mg, 0.041 mmol, 35% yield). MS (ESI+) *m/z* calcd for C<sub>22</sub>H<sub>22</sub>N<sub>5</sub>O<sup>+</sup> [M + H]<sup>+</sup> 372.2, found 372.3. <sup>1</sup>H NMR (300 MHz, DMSO-*d*<sub>6</sub>) δ 9.91 (s, 1H), 9.43 (s, 1H), 8.32 (s, 1H), 7.76 (d, *J* = 9.0 Hz, 2H), 7.66 – 7.47 (m, 5H), 7.29 (d, *J* = 8.2 Hz, 1H), 6.96 (d, *J* = 3.7 Hz, 1H), 2.31 (s, 3H), 2.28 (s, 3H), 2.04 (s, 3H). UPLC analysis (method C), 4.97 min, 97% purity.

#### Synthesis of 7-(3,4-dimethylphenyl)-N-(6-methoxypyridin-3-yl)-7H-pyrrolo[2,3-d]pyrimidin-4-amine (**45**)

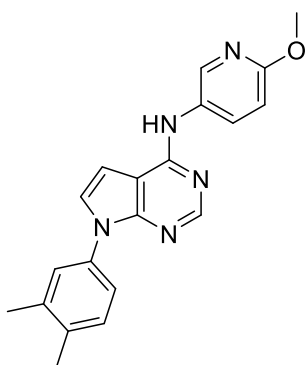

A stirred mixture of 4-chloro-7-(3,4-dimethylphenyl)pyrrolo[2,3-d]pyrimidine (37 mg, 0.14 mmol), 6-methoxypyridin-3-amine (36 mg, 0.29 mmol), K<sub>3</sub>PO<sub>4</sub> (61 mg, 0.29 mmol) and XPhos Pd G2 (11 mg, 0.014 mmol) in toluene (3.0 mL) was sealed in a microwave tube and degassed with nitrogen for 5 min. The reaction was stirred at 150 °C for 36 h. The reaction was applied to an SCX-2 cartridge, washed with DCM (Caution! Carcinogenic) and MeOH and eluted with 2 M methanolic ammonia. The basic fraction was concentrated *in vacuo* and purified by preparatory HPLC (elution gradient: 40-80% MeCN in H<sub>2</sub>O with 0.1% NH<sub>3</sub>) to yield 7-(3,4-dimethylphenyl)-N-(6-methoxypyridin-3-yl)-7H-pyrrolo[2,3-d]pyrimidin-4-amine **45** (7.0 mg, 0.020 mmol, 14% yield). MS (ESI+) *m/z* calcd for C<sub>20</sub>H<sub>20</sub>N<sub>5</sub>O<sup>+</sup> [M + H]<sup>+</sup> 346.2, found 346.3. <sup>1</sup>H NMR (300 MHz, Chloroform-*d*) δ 8.46 (s, 1H), 8.32 (dd, *J* = 2.8, 0.7 Hz, 1H), 7.94 (dd, *J* = 8.8, 2.8 Hz, 1H), 7.42 (d, *J* = 2.2 Hz, 1H), 7.36 (dd, *J* = 8.0, 2.3 Hz, 1H), 7.26 (s, 1H), 7.21 (d, *J* = 3.6 Hz, 1H), 7.00 (s, 1H), 6.84 (dd, *J* = 8.8, 0.7 Hz, 1H), 6.21 (d, *J* = 3.7 Hz, 1H), 3.99 (s, 3H), 2.35 (s, 3H), 2.33 (s, 3H). UPLC analysis (method C), 5.56 min, 96% purity.

### Synthesis of N-(7-(3,4-dimethylphenyl)-7H-pyrrolo[2,3-d]pyrimidin-4-yl)isoxazol-4-amine (46)

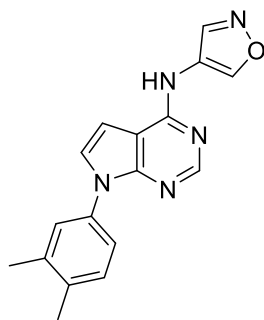

A stirred mixture of 4-chloro-7-(3,4-dimethylphenyl)pyrrolo[2,3-d]pyrimidine (100 mg, 0.39 mmol), 1,2-oxazol-4-amine hydrochloride (58 mg, 0.49 mmol), Cs<sub>2</sub>CO<sub>3</sub> (400 mg, 1.2 mmol), Pd<sub>2</sub>(dba)<sub>3</sub> (18 mg, 0.019 mmol) and Xantphos (22 mg, 0.039 mmol) in 1,4-dioxane (Caution! Carcinogenic; 3.0 mL) was sealed in a microwave tube and degassed with nitrogen for 5 min. The reaction was heated in a microwave at 120 °C for 30 min. The reaction mixture was passed through a pad of silica, concentrated *in vacuo* and purified by preparatory HPLC (elution gradient: 40-80% MeCN in H<sub>2</sub>O with 0.1% NH<sub>3</sub>) to yield N-(7-(3,4-dimethylphenyl)-7H-pyrrolo[2,3-d]pyrimidin-4-yl)isoxazol-4-amine **46** (16 mg, 0.052 mmol, 13% yield). MS (ESI+) *m/z* calcd for C<sub>17</sub>H<sub>16</sub>N<sub>5</sub>O<sup>+</sup> [M + H]<sup>+</sup> 306.1, found 306.2. <sup>1</sup>H NMR (300 MHz, DMSO-*d*<sub>6</sub>) δ 9.94 (s, 1H), 9.36 (s, 1H), 8.80 (s, 1H), 8.43 (s, 1H), 7.67 (d, *J* = 3.6 Hz, 1H), 7.59 (d, *J* = 2.0 Hz, 1H), 7.52 (dd, *J* = 8.1, 2.3 Hz, 1H), 7.30 (d, *J* = 8.1 Hz, 1H), 6.89 (d, *J* = 3.7 Hz, 1H), 3.23 (s, 3H), 2.29 (s, 3H). UPLC analysis (method D), 5.38 min, 96% purity.

### Synthesis of ARUK2004789 7-(3-aminophenyl)-N-(4-methoxyphenyl)-7H-pyrrolo[2,3-d]pyrimidin-4-amine (47)

4-chloro-7-(3-nitrophenyl)pyrrolo[2,3-d]pyrimidine

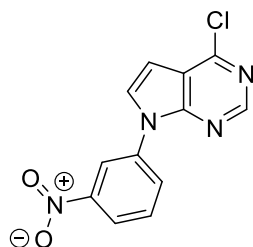

To a stirred solution of 6-chloro-7-deazapurine (500 mg, 3.3 mmol), CuI (43 mg, 0.23 mmol), 1-iodo-3-nitrobenzene (970 mg, 0.60 mL, 3.9 mmol) and K<sub>3</sub>PO<sub>4</sub> tribasic anhydrous (1.5 g, 7.2 mmol) in 1,4-dioxane (Caution! Carcinogenic; 10 mL) was added *trans* N,N'-dimethylcyclohexane-1,2-diamine (46 mg, 0.051 mL, 0.33

mmol) and the reaction sealed under nitrogen and heated at 110 °C overnight. The reaction was filtered, concentrated *in vacuo* and purified by silica column chromatography (elution gradient: 0-100% ethyl acetate in hexane) to yield 4-chloro-7-(3-nitrophenyl)pyrrolo[2,3-d]pyrimidine (60 mg, 0.22 mmol, 6.7% yield). MS (ESI+)  $m/z$  calcd for  $C_{12}H_8N_4O_2^+$  [M + H]<sup>+</sup> 275.0, found 275.1. UPLC analysis (method A), 3.40 min.

N-(3-chloro-4-methoxy-phenyl)-7-(3-nitrophenyl)pyrrolo[2,3-d]pyrimidin-4-amine

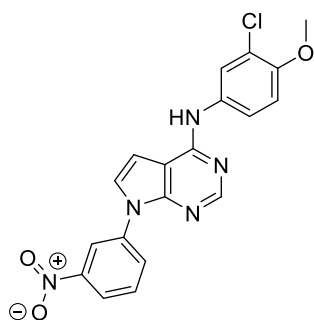

A stirred mixture of 4-chloro-7-(3-nitrophenyl)pyrrolo[2,3-d]pyrimidine (50 mg, 0.18 mmol),  $Cs_2CO_3$  (130 mg, 0.40 mmol),  $Pd_2(dba)_3$  (8.0 mg, 0.0087 mmol), Xantphos (11 mg, 0.019 mmol) and 3-chloro-4-methoxyaniline (36 mg, 0.23 mmol) in 1,4-dioxane (Caution! Carcinogenic; 3.0 mL) was sealed in a microwave tube and degassed with nitrogen for 5 min. The reaction was heated in a microwave at 125 °C for 55 min. The reaction was placed on an SCX-2 cartridge, washed with DCM (Caution! Carcinogenic) and MeOH and eluted with 2 M methanolic ammonia. The basic fraction was concentrated *in vacuo* and purified by preparatory HPLC (elution gradient: 40-80% MeCN in  $H_2O$  with 0.1%  $NH_3$ ) to yield N-(3-chloro-4-methoxy-phenyl)-7-(3-nitrophenyl)pyrrolo[2,3-d]pyrimidin-4-amine (20 mg, 0.049 mmol, 27% yield). MS (ESI+)  $m/z$  calcd for  $C_{19}H_{15}ClN_5O_3^+$  [M + H]<sup>+</sup> 396.1, found 396.2. <sup>1</sup>H NMR (300 MHz,  $DMSO-d_6$ )  $\delta$  9.60 (s, 1H), 8.94 (t,  $J = 2.2$  Hz, 1H), 8.46 (s, 1H), 8.38 (ddd,  $J = 8.2, 2.2, 0.9$  Hz, 1H), 8.22 (ddd,  $J = 8.3, 2.3, 0.9$  Hz, 1H), 8.10 (d,  $J = 2.7$  Hz, 1H), 7.95 (d,  $J = 3.8$  Hz, 1H), 7.86 (t,  $J = 8.2$  Hz, 1H), 7.72 (dd,  $J = 9.0, 2.6$  Hz, 1H), 7.19 (d,  $J = 9.0$  Hz, 1H), 7.08 (d,  $J = 3.8$  Hz, 1H), 3.86 (s, 3H). UPLC analysis (method D), 5.55 min, 100% purity.

7-(3-aminophenyl)-N-(4-methoxyphenyl)-7H-pyrrolo[2,3-d]pyrimidin-4-amine (**47**)

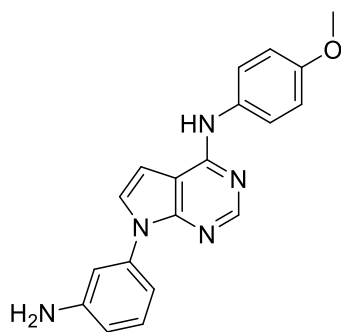

A stirred solution of N-(3-chloro-4-methoxy-phenyl)-7-(3-nitrophenyl)pyrrolo[2,3-d]pyrimidin-4-amine (15 mg, 0.038 mmol) in MeOH (10 mL) was evacuated *in vacuo* and back filled with nitrogen 3 times before 10% Pd/C (0.040 mmol) was added and the reaction again placed under nitrogen. The reaction was evacuated *in vacuo* and back filled with hydrogen gas 3 times and left under an atmosphere of hydrogen with stirring overnight. The reaction was filtered through Celite® and concentrated *in vacuo*. Purification by preparatory HPLC (elution gradient: 20-60% MeCN in H<sub>2</sub>O with 0.1% NH<sub>3</sub>) yielded 7-(3-aminophenyl)-N-(4-methoxyphenyl)-7H-pyrrolo[2,3-d]pyrimidin-4-amine **47** (2.2 mg, 0.0067 mmol, 18% yield). MS (ESI+) *m/z* calcd for C<sub>19</sub>H<sub>18</sub>N<sub>5</sub>O<sup>+</sup> [M + H]<sup>+</sup> 332.2, found 332.2. <sup>1</sup>H NMR (300 MHz, DMSO-*d*<sub>6</sub>) δ 9.33 (s, 1H), 8.27 (s, 1H), 7.75 – 7.68 (m, 2H), 7.52 (d, *J* = 3.7 Hz, 1H), 7.14 (t, *J* = 8.0 Hz, 1H), 7.02 (t, *J* = 2.1 Hz, 1H), 6.98 – 6.91 (m, 2H), 6.89 (d, *J* = 3.6 Hz, 1H), 6.82 (ddd, *J* = 7.9, 2.0, 0.8 Hz, 1H), 6.55 (ddd, *J* = 8.1, 2.1, 0.8 Hz, 1H), 5.36 (s, 2H), 3.76 (s, 3H). UPLC analysis (method C), 4.38 min, 100% purity.

Synthesis of N-(3-chloro-4-methoxyphenyl)-7-cyclopropyl-7H-pyrrolo[2,3-d]pyrimidin-4-amine (**48**)

4-Chloro-7-cyclopropyl-pyrrolo[2,3-d]pyrimidine

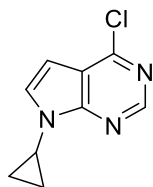

A solution of 6-chloro-7-deazapurine (1.0 g, 6.5 mmol), cyclopropyl boronic acid (1.12 mg, 13 mmol), 2,2'-bipyridine (1.0 g, 1.0 mL, 6.5 mmol), Cu(OAc)<sub>2</sub> (1.18 g, 6.5 mmol) and Na<sub>2</sub>CO<sub>3</sub> (1.38 g, 13 mmol) in DCE (Caution! Possible arcinogen; 35 mL) was stirred at reflux for 42 h. The reaction was cooled to rt, filtered,

concentrated *in vacuo* and purified by silica column chromatography (elution gradient: 0-50% ethyl acetate in hexane) to give 4-chloro-7-cyclopropyl-pyrrolo[2,3-d]pyrimidine (603 mg, 3.1 mmol, 48% yield). MS (ESI+) *m/z* calcd for C<sub>9</sub>H<sub>8</sub>ClN<sub>3</sub><sup>+</sup> [M + H]<sup>+</sup> 194.1, found 194.1. UPLC analysis (method A), 2.63 min.

N-(3-chloro-4-methoxyphenyl)-7-cyclopropyl-7H-pyrrolo[2,3-d]pyrimidin-4-amine (**48**)

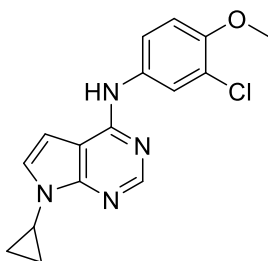

A stirred mixture of 4-chloro-7-cyclopropyl-pyrrolo[2,3-d]pyrimidine (100 mg, 0.52 mmol), 3-chloro-4-methoxyaniline (102 mg, 0.65 mmol), Cs<sub>2</sub>CO<sub>3</sub> (367 mg, 1.1 mmol), Pd<sub>2</sub>(dba)<sub>3</sub> (247, 0.026 mmol) and Xantphos (30 mg, 0.052 mmol) in 1,4-dioxane (Caution! Carcinogenic; 3.0 mL) was sealed in a microwave vial and degassed with nitrogen for 5 min. The reaction was heated in a microwave at 125 °C for 60 min. The reaction was placed on an SCX-2 cartridge, washed with DCM (Caution! Carcinogenic) and MeOH and eluted with 2 M methanolic ammonia. The basic fraction was concentrated *in vacuo* and purified by preparatory HPLC (elution gradient: 20-60% MeCN in H<sub>2</sub>O with 0.1% NH<sub>3</sub>) to yield N-(3-chloro-4-methoxyphenyl)-7-cyclopropyl-7H-pyrrolo[2,3-d]pyrimidin-4-amine **48** (28 mg, 0.088 mmol, 17% yield). MS (ESI+) *m/z* calcd for C<sub>16</sub>H<sub>16</sub>ClN<sub>4</sub>O<sup>+</sup> [M + H]<sup>+</sup> 315.1, found 315.2. <sup>1</sup>H NMR (300 MHz, DMSO-*d*<sub>6</sub>) δ 9.31 (s, 1H), 8.31 (s, 1H), 8.09 (d, *J* = 2.6 Hz, 1H), 7.69 (dd, *J* = 9.0, 2.6 Hz, 1H), 7.23 (d, *J* = 3.6 Hz, 1H), 7.14 (d, *J* = 9.1 Hz, 1H), 6.70 (d, *J* = 3.6 Hz, 1H), 3.83 (s, 3H), 3.55 (tt, *J* = 6.5, 4.6 Hz, 1H), 1.01 (ddt, *J* = 6.0, 4.3, 2.6 Hz, 4H). UPLC analysis (method C), 4.86 min, 96% purity.

## Synthesis of 7-((1H-imidazol-4-yl)methyl)-N-(3-chloro-4-methoxyphenyl)-7H-pyrrolo[2,3-d]pyrimidin-4-amine (49)

4-chloro-7-(1H-imidazol-4-ylmethyl)pyrrolo[2,3-d]pyrimidine

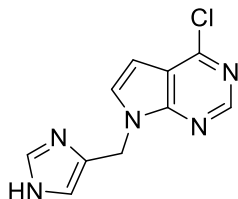

To a stirred solution of 6-chloro-7-deazapurine (250 mg, 1.6 mmol) in DMF (Caution! Carcinogenic; 5.0 mL) at 0 °C was added NaH 60% w/w (Caution! Flammable, corrosive; 157 mg, 3.9 mmol) and the reaction was stirred for 10 min before 4-(chloromethyl)-1H-imidazole hydrochloride (Caution! toxic; 311 mg, 2.0 mmol) was added and the reaction allowed to warm to rt slowly and stirred for a further 1 h. The reaction was diluted with H<sub>2</sub>O and DCM (Caution! Carcinogenic), extracted with 3:1 CHCl<sub>3</sub>:IPA, dried (MgSO<sub>4</sub>) and concentrated *in vacuo* to give 4-chloro-7-(1H-imidazol-4-ylmethyl)pyrrolo[2,3-d]pyrimidine (327 mg, 1.4 mmol, 86% yield) which was used without further purification. MS (ESI+) m/z calcd for C<sub>10</sub>H<sub>9</sub>ClN<sub>5</sub><sup>+</sup> [M + H]<sup>+</sup> 234.1, found 234.2. UPLC analysis (method B), 1.93 min.

7-((1H-imidazol-4-yl)methyl)-N-(3-chloro-4-methoxyphenyl)-7H-pyrrolo[2,3-d]pyrimidin-4-amine (49)

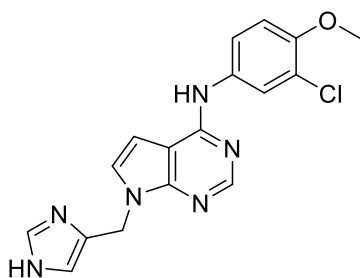

A stirred mixture of 3-chloro-4-methoxyaniline (662 mg, 4.2 mmol), 4-chloro-7-(1H-imidazol-4-ylmethyl)pyrrolo[2,3-d]pyrimidine (327 mg, 1.4 mmol) and DCE (Caution! Possible arcinogen; 10 mL) was sealed in a microwave vial under a nitrogen atmosphere. The reaction was heated to 130 °C for 4 h. The reaction mixture was diluted with H<sub>2</sub>O and DCM (Caution! Carcinogenic), and the aqueous phase was concentrated *in vacuo* and purified by preparatory HPLC (elution gradient: 10-50% MeCN in H<sub>2</sub>O with 0.1% NH<sub>3</sub>) to yield 7-((1H-imidazol-4-yl)methyl)-N-(3-chloro-4-methoxyphenyl)-7H-pyrrolo[2,3-d]pyrimidin-4-amine **49** (74 mg,



0.21 mmol, 15% yield). MS (ESI+)  $m/z$  calcd for  $C_{17}H_{16}ClN_6O^+$   $[M + H]^+$  355.1, found 355.2.  $^1H$  NMR (300 MHz,  $DMSO-d_6$ )  $\delta$  11.97 (s, 1H), 9.32 (s, 1H), 8.32 (s, 1H), 8.10 (d,  $J = 2.6$  Hz, 1H), 7.70 (dd,  $J = 9.0, 2.6$  Hz, 1H), 7.58 (d,  $J = 1.0$  Hz, 1H), 7.28 (d,  $J = 3.5$  Hz, 1H), 7.14 (d,  $J = 9.1$  Hz, 1H), 7.01 (s, 1H), 6.73 (d,  $J = 3.5$  Hz, 1H), 5.24 (s, 2H), 3.84 (s, 3H). UPLC analysis (method D), 2.91 min, 100% purity.

### Synthesis of N-(3-chloro-4-methoxyphenyl)-7-(1-methyl-1H-pyrazol-3-yl)-7H-pyrrolo[2,3-d]pyrimidin-4-amine (50)

4-chloro-7-(1-methylpyrazol-3-yl)pyrrolo[2,3-d]pyrimidine

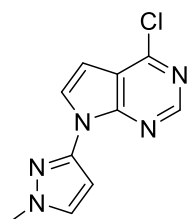

A solution of 6-chloro-7-deazapurine (200 mg, 1.3 mmol), 1-methyl-3-(4,4,5,5-tetramethyl-1,3,2-dioxaborolan-2-yl)-1H-pyrazole (542 mg, 2.6 mmol), 2,2'-bipyridine (203 mg, 0.21 mL, 1.3 mmol),  $Cu(OAc)_2$  (237 mg, 1.3 mmol) and  $Na_2CO_3$  (276 mg, 2.6 mmol) in DCE (Caution! Possible arcinogen; 10 mL) was stirred in a microwave vial at 110 °C for 24 h. The reaction mixture was cooled to rt, washed with  $Cu_2SO_4$  solution, extracted with DCM (Caution! Carcinogenic), dried ( $MgSO_4$ ) and concentrated *in vacuo*. The material was purified by silica column chromatography (elution gradient: 0-100% ethyl acetate in hexane) to yield 4-chloro-7-(1-methylpyrazol-3-yl)pyrrolo[2,3-d]pyrimidine (142 mg, 0.61 mmol, 47% yield). MS (ESI+)  $m/z$  calcd for  $C_{10}H_9ClN_5^+$   $[M + H]^+$  234.1, found 234.1. UPLC analysis (method A), 2.90 min.

N-(3-chloro-4-methoxyphenyl)-7-(1-methyl-1H-pyrazol-3-yl)-7H-pyrrolo[2,3-d]pyrimidin-4-amine (50)

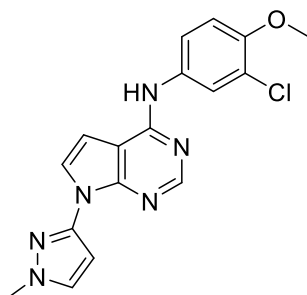

A stirred mixture of 4-chloro-7-(1-methylpyrazol-3-yl)pyrrolo[2,3-d]pyrimidine (50 mg, 0.22 mmol), 3-chloro-4-methoxyaniline (42 mg, 0.27 mmol), Cs<sub>2</sub>CO<sub>3</sub> (153 mg, 0.47 mmol), Pd<sub>2</sub>(dba)<sub>3</sub> (10 mg, 0.011 mmol) and Xantphos (12 mg, 0.021 mmol) in 1,4-dioxane (Caution! Carcinogenic; 3.0 mL) was sealed in a microwave tube and degassed with nitrogen for 5 min. The reaction was heated in a microwave at 125 °C for 45 min. The reaction was applied to an SCX-2 cartridge, washed with DCM (Caution! Carcinogenic) and MeOH and eluted with 2 M methanolic ammonia. The basic fraction was concentrated *in vacuo* and purified by preparatory HPLC (elution gradient: 40-80% MeCN in H<sub>2</sub>O with 0.1% NH<sub>3</sub>) to yield N-(3-chloro-4-methoxyphenyl)-7-(1-methyl-1H-pyrazol-3-yl)-7H-pyrrolo[2,3-d]pyrimidin-4-amine **50** (19 mg, 0.054 mmol, 25% yield). MS (ESI+) *m/z* calcd for C<sub>17</sub>H<sub>16</sub>ClN<sub>6</sub>O<sup>+</sup> [M + H]<sup>+</sup> 355.1, found 355.2. <sup>1</sup>H NMR (300 MHz, DMSO-*d*<sub>6</sub>) δ 9.49 (s, 1H), 8.40 (s, 1H), 8.09 (d, *J* = 2.6 Hz, 1H), 7.81 (d, *J* = 2.1 Hz, 1H), 7.74 – 7.66 (m, 2H), 7.17 (d, *J* = 9.1 Hz, 1H), 6.95 (d, *J* = 3.7 Hz, 1H), 6.92 (d, *J* = 2.3 Hz, 1H), 3.88 (s, 3H), 3.85 (s, 3H). UPLC analysis (method C), 5.49 min, 100% purity.

#### Data for the commercially available compound **20**

1-(4-chloro-2-methylphenyl)-N-(3-chloro-4-methoxyphenyl)-1H-pyrazolo[3,4-d]pyrimidin-4-amine **20**

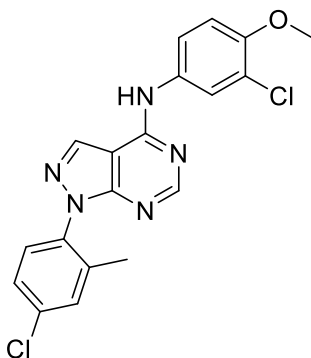

MS (ESI+) *m/z* calcd for C<sub>19</sub>H<sub>16</sub>Cl<sub>2</sub>N<sub>5</sub>O<sup>+</sup> [M + H]<sup>+</sup> 400.1, found 400.1. <sup>1</sup>H NMR (300 MHz, DMSO-*d*<sub>6</sub>) δ 10.23 (s, 1H), 8.48 (s, 1H), 8.41 (s, 1H), 8.06 (s, 1H), 7.67 (dd, *J* = 8.9, 2.5 Hz, 1H), 7.58 (d, *J* = 1.1 Hz, 1H), 7.45 (d, *J* = 1.9 Hz, 2H), 7.21 (d, *J* = 9.1 Hz, 1H), 3.87 (s, 3H), 2.09 (s, 3H). <sup>13</sup>C NMR (75 MHz, DMSO) δ 156.13, 154.43, 153.85, 150.98, 137.41, 135.55, 133.52, 133.33, 132.50, 130.69, 129.46, 126.57, 123.17, 121.40, 120.59, 112.94, 101.06, 56.26, 17.63. UPLC analysis (method C), 5.88 min, 100% purity.

Spectra for key compounds 20, 36, 39, 43, and 45

1-(4-chloro-2-methylphenyl)-N-(3-chloro-4-methoxyphenyl)-1H-pyrazolo[3,4-d]pyrimidin-4-amine (20)

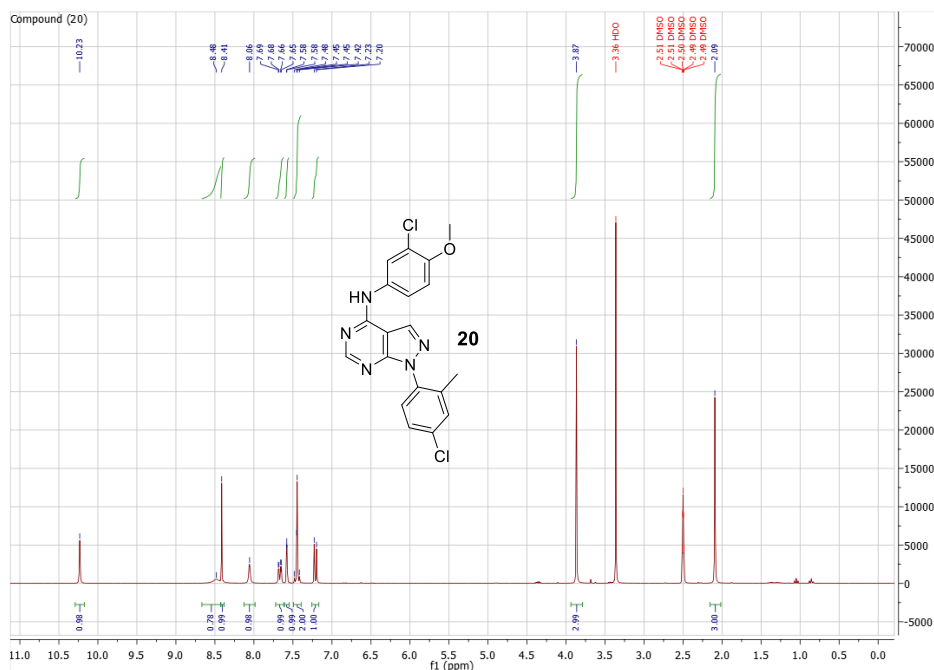

$^1\text{H}$  NMR (300 MHz, DMSO- $d_6$ )  $\delta$  10.23 (s, 1H), 8.48 (s, 1H), 8.41 (s, 1H), 8.06 (s, 1H), 7.67 (dd,  $J = 8.9, 2.5$  Hz, 1H), 7.58 (d,  $J = 1.1$  Hz, 1H), 7.45 (d,  $J = 1.9$  Hz, 2H), 7.21 (d,  $J = 9.1$  Hz, 1H), 3.87 (s, 3H), 2.09 (s, 3H).

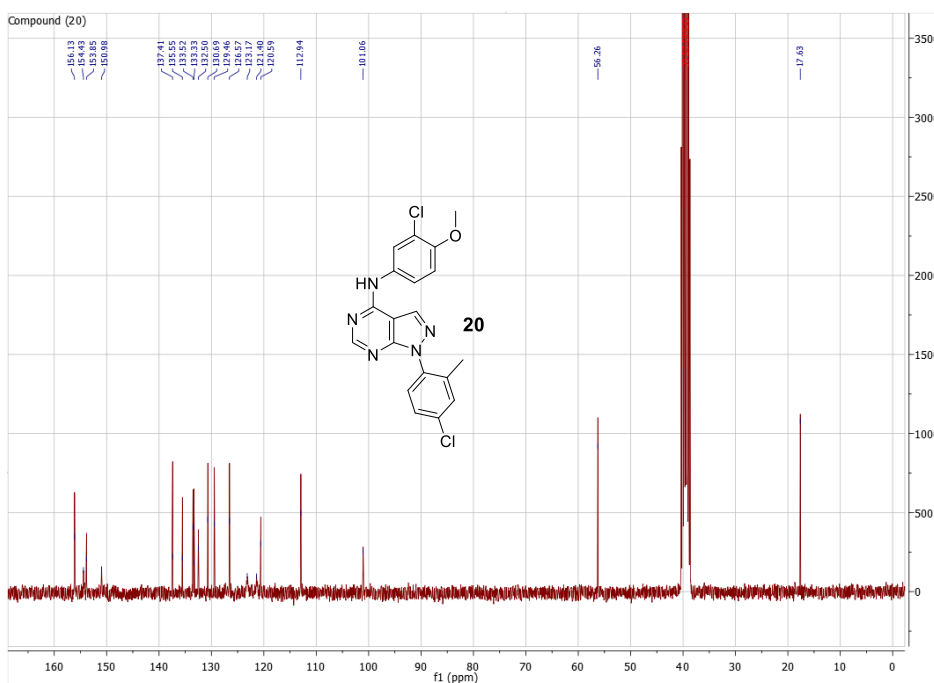

$^{13}\text{C}$  NMR (75 MHz, DMSO)  $\delta$  156.13, 154.43, 153.85, 150.98, 137.41, 135.55, 133.52, 133.33, 132.50, 130.69, 129.46, 126.57, 123.17, 121.40, 120.59, 112.94, 101.06, 56.26, 17.63.

N-(3-chloro-4-methoxy-phenyl)-7-(3,4-dimethylphenyl)pyrrolo[2,3-d]pyrimidin-4-amine (**36**)

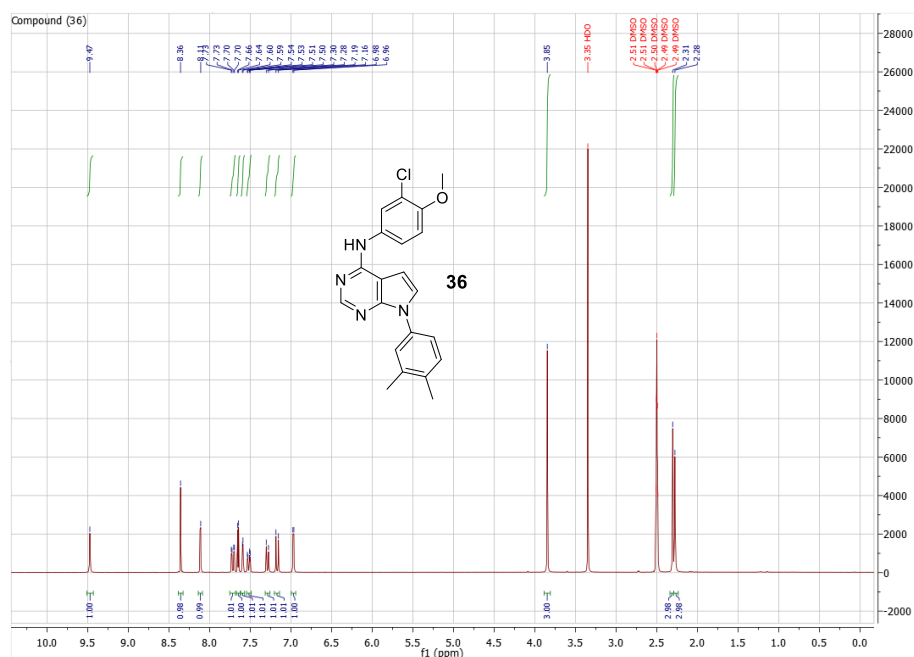

<sup>1</sup>H NMR (300 MHz, DMSO-*d*<sub>6</sub>) δ 9.47 (s, 1H), 8.36 (s, 1H), 8.11 (d, *J* = 2.6 Hz, 1H), 7.72 (dd, *J* = 9.0, 2.6 Hz, 1H), 7.65 (d, *J* = 3.7 Hz, 1H), 7.59 (d, *J* = 2.0 Hz, 1H), 7.52 (dd, *J* = 8.2, 2.3 Hz, 1H), 7.29 (d, *J* = 8.3 Hz, 1H), 7.17 (d, *J* = 9.1 Hz, 1H), 6.97 (d, *J* = 3.7 Hz, 1H), 3.85 (s, 3H), 2.31 (s, 3H), 2.28 (s, 3H).

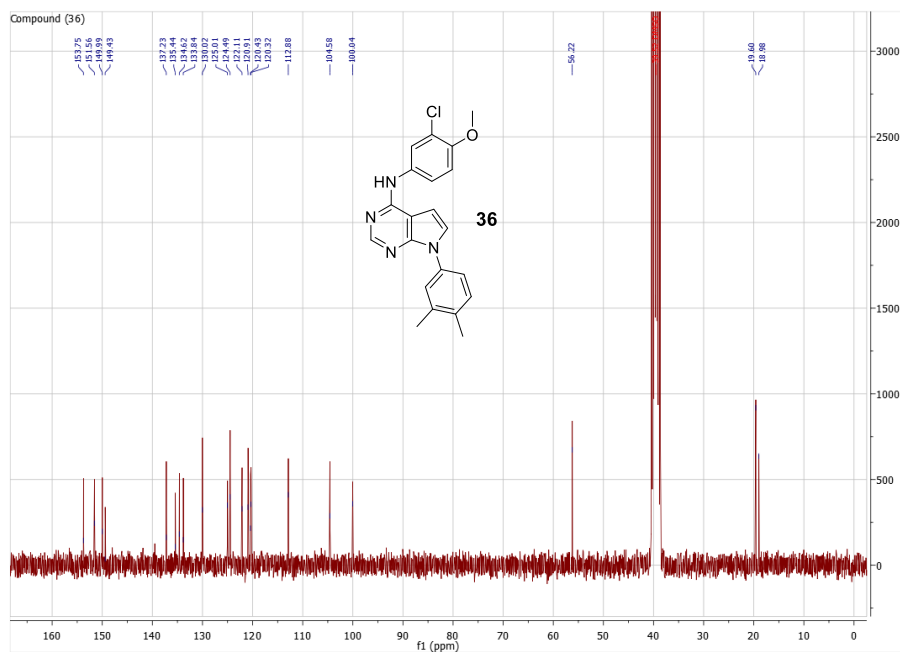

<sup>13</sup>C NMR (75 MHz, DMSO) δ 153.75, 151.56, 149.99, 149.43, 137.23, 135.44, 134.62, 133.84, 130.02, 125.01, 124.49, 122.11, 120.91, 120.43, 120.32, 112.88, 104.58, 100.04, 56.22, 19.60, 18.98.

4-(3-chloro-4-methoxy-anilino)-7-(3,4-dimethylphenyl)-5H-pyrrolo[2,3-d]pyrimidin-6-one (**39**)

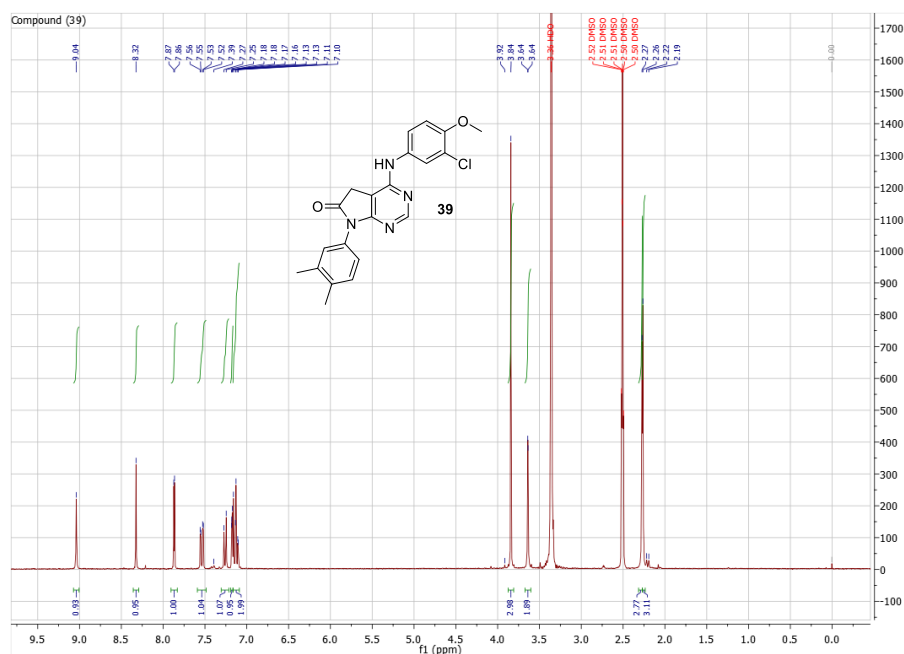

$^1\text{H}$  NMR (300 MHz,  $\text{DMSO-}d_6$ )  $\delta$  9.04 (s, 1H), 8.32 (s, 1H), 7.87 (d,  $J = 2.6$  Hz, 1H), 7.54 (dd,  $J = 9.0, 2.6$  Hz, 1H), 7.26 (d,  $J = 8.1$  Hz, 1H), 7.18 (d,  $J = 2.4$  Hz, 1H), 7.13 (dd,  $J = 8.6, 6.8$  Hz, 2H), 3.84 (s, 3H), 3.67 – 3.60 (m, 2H), 2.27 (s, 3H), 2.26 (s, 3H).

N-(3-((7-(3,4-dimethylphenyl)-7H-pyrrolo[2,3-d]pyrimidin-4-yl)amino)phenyl)acetamide (**43**)

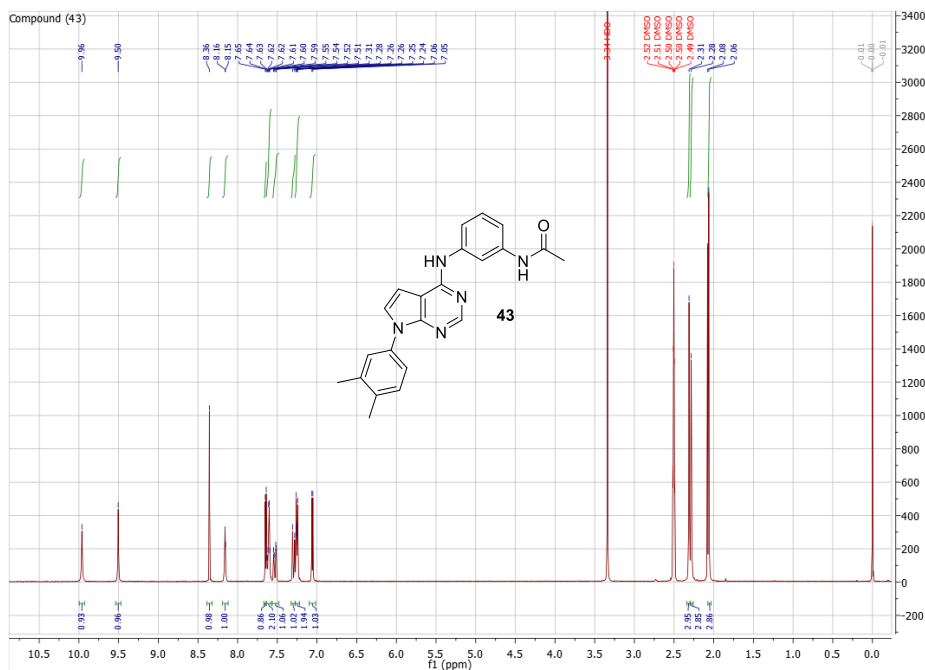

$^1\text{H}$  NMR (300 MHz,  $\text{DMSO-}d_6$ )  $\delta$  9.96 (s, 1H), 9.50 (s, 1H), 8.36 (s, 1H), 8.16 (d,  $J = 2.0$  Hz, 1H), 7.65 (d,  $J = 3.7$  Hz, 1H), 7.63-7.58 (m, 2H), 7.53 (dd,  $J = 8.1, 2.3$  Hz, 1H), 7.29 (d,  $J = 8.2$  Hz, 1H), 7.28 – 7.22 (m, 2H), 7.06 (d,  $J = 3.7$  Hz, 1H), 2.31 (s, 3H), 2.28 (s, 3H), 2.06 (s, 3H).

7-(3,4-dimethylphenyl)-N-(6-methoxypyridin-3-yl)-7H-pyrrolo[2,3-d]pyrimidin-4-amine (**45**)

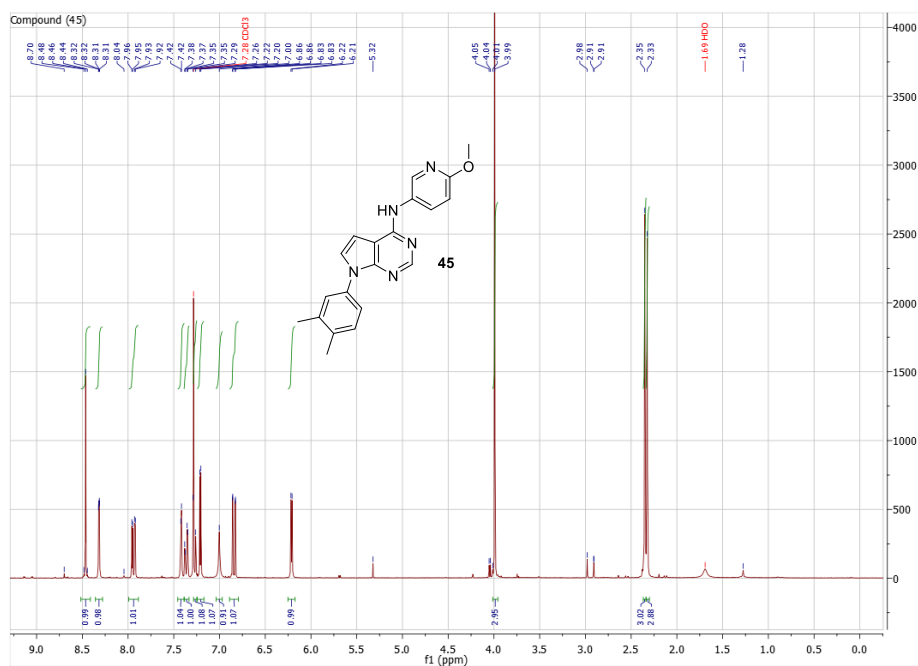

<sup>1</sup>H NMR (300 MHz, Chloroform-*d*) δ 8.46 (s, 1H), 8.32 (dd, *J* = 2.8, 0.7 Hz, 1H), 7.94 (dd, *J* = 8.8, 2.8 Hz, 1H), 7.42 (d, *J* = 2.2 Hz, 1H), 7.36 (dd, *J* = 8.0, 2.3 Hz, 1H), 7.26 (s, 1H), 7.21 (d, *J* = 3.6 Hz, 1H), 7.00 (s, 1H), 6.84 (dd, *J* = 8.8, 0.7 Hz, 1H), 6.21 (d, *J* = 3.7 Hz, 1H), 3.99 (s, 3H), 2.35 (s, 3H), 2.33 (s, 3H).

## Commercially available final compounds

The following compounds were purchased from the supplier indicated and used without further purification.

| Compound | Supplier        | Supplier reference |
|----------|-----------------|--------------------|
| 8        | BioAscent       | BCC0079802         |
| 9        | Enamine         | Z228679384         |
| 10       | BioAscent       | BCC0099025         |
| 11       | BioAscent       | BCC0100181         |
| 12       | BioAscent       | BCC0004551         |
| 13       | Enamine         | Z54200819          |
| 14       | BioAscent       | BCC0003114         |
| 15       | BioAscent       | BCC0001953         |
| 16       | ChemDiv         | C499-0447          |
| 17       | Molport         | K405-3569          |
| 18       | Molport         | STL336331          |
| 19       | Molport         | STL336152          |
| 20       | Enamine         | Z1041113980        |
| 21       | Molport         | STK944279          |
| 22       | Chemtellect Inc | CS-74-038259       |
| 23       | Enamine         | Z1041114034        |
| 24       | STK859322       | STK859322          |
| 25       | Molport         | STL336454          |
| 26       | Enamine         | Z1041113988        |
| 30       | BioAscent       | BCC0045193         |
| 32       | Molport         | K405-3091          |

**Table S1.** Analogues of **10** for which PI5P4K $\alpha$  and  $\gamma$  pIC<sub>50</sub>s were determined. Another 52 compounds from the BioAscent collection with substructure similarity to **10** were tested at single point only and found to show <30% inhibition at 10  $\mu$ M.

| PI5P4K $\alpha$ pIC <sub>50</sub> | PI5P4K $\gamma$ + pIC <sub>50</sub> | SMILES                                                                  | Supplier Reference | Supplier       |
|-----------------------------------|-------------------------------------|-------------------------------------------------------------------------|--------------------|----------------|
| 5.0                               | 5.0                                 | <chem>Fc1ccc2n(cnc2c1)C1CCCN(C1)C(=O)c1cc(n[nH]1)-c1ccco1</chem>        | BCC0098020         | BioAscent      |
| 4.8                               | < 4.4                               | <chem>Cc1cc2nc(cc(n2n1)C(F)(F)F)C1CCCN(C1)C(=O)c1cc(on1)-c1ccco1</chem> | BCC0100858         | BioAscent      |
| < 4.4                             | < 4.4                               | <chem>O=C(NC1CCCC1)c1cc([nH]n1)-c1ccco1</chem>                          | BCC0014827         | BioAscent      |
| < 4.4                             | < 4.4                               | <chem>Cc1cc(no1)NC(=O)c1cc([nH]n1)-c1ccco1</chem>                       | BCC0014803         | BioAscent      |
| < 4.3                             | < 4.3                               | <chem>Cc1nnc(s1)C1CCCN(C1)C(=O)c1cc(n[nH]1)-c1ccco1</chem>              | F5493-0522         | Life chemicals |
| < 4.3                             | < 4.4                               | <chem>Clc1cncce1OC1CCCN(C1)C(=O)c1cc(n[nH]1)-c1ccco1</chem>             | F6480-1186         | Life chemicals |
| < 4.3                             | < 4.3                               | <chem>O=C(N1CCCC(C1)Cc1nc(no1)C1CC1)c1cc(n[nH]1)-c1ccco1</chem>         | F6497-0421         | Life chemicals |
| < 4.3                             | < 4.3                               | <chem>Cn1ccc(n1)C1CCCN(C1)C(=O)c1cc(n[nH]1)-c1ccco1</chem>              | F6554-0634         | Life chemicals |

**Table S2.** Analogues of **11** for which PI5P4K $\alpha$  and  $\gamma$  pIC<sub>50</sub>s were determined. Another 30 compounds from the BioAscent collection with substructure similarity to **11** were tested at single point only and found to show <40% inhibition at 10  $\mu$ M.

| PI5P4K $\alpha$ pIC <sub>50</sub> | PI5P4K $\gamma$ + pIC <sub>50</sub> | SMILES                                                        | Supplier Reference | Supplier  |
|-----------------------------------|-------------------------------------|---------------------------------------------------------------|--------------------|-----------|
| 4.8                               | 5.0                                 | <chem>Fc1cccc1CNc1ncc(c(n1)-c1ccco1)-c1cncn1</chem>           | BCC0099334         | BioAscent |
| < 4.4                             | 4.7                                 | <chem>COc1ccc(cc1)OCCCNc1ncc(c(n1)-c1ccco1)-c1cncn1</chem>    | BCC0100112         | BioAscent |
| 5.4                               | 5.5                                 | <chem>Cc1noc(c1CCNc1ncc(c(n1)-c1ccco1)-c1cncn1)C</chem>       | BCC0100189         | BioAscent |
| < 4.4                             | < 4.4                               | <chem>COc1cccc(c1)CNc1ncc(c(n1)-c1ccco1)-c1cc(no1)C</chem>    | BCC0099140         | BioAscent |
| 5.2                               | 4.9                                 | <chem>Fc1ccc(cc1)CCNc1ncc(c(n1)-c1ccco1)-c1cncn1</chem>       | BCC0100757         | BioAscent |
| 4.9                               | 4.4                                 | <chem>Cc1cc(on1)-c1cnc(nc1-c1ccco1)NCc1cccc(c1)F</chem>       | BCC0099144         | BioAscent |
| < 4.8                             | 5.8                                 | <chem>Clc1cccc1CNc1ncc(c(n1)-c1ccco1)-c1cncn1</chem>          | BCC0099207         | BioAscent |
| 4.6                               | < 4.4                               | <chem>CN(Cc1cccc1)c1ncc(c(n1)-c1ccco1)-c1cc(no1)C</chem>      | BCC0099237         | BioAscent |
| < 4.4                             | < 4.7                               | <chem>Clc1cccc1CCNc1ncc(c(n1)-c1ccco1)-c1cncn1</chem>         | BCC0099337         | BioAscent |
| < 4.6                             | NA                                  | <chem>CN1CCC(CC1)Nc1ncc(c(n1)-c1senc1C)-c1ccc(cc1)F</chem>    | Amb20119498        | Ambinter  |
| < 4.6                             | NA                                  | <chem>Cn1cnc1-c1nc(nc1-c1ccc(cc1)F)NC1CCCC1</chem>            | Amb20118393        | Ambinter  |
| < 4.6                             | NA                                  | <chem>Cn1cnc1-c1nc(nc1-c1cccc(c1)F)NC1CCN(CC1)Cc1cccc1</chem> | Amb13895326        | Ambinter  |

**Table S3.** Additional commercial analogues of **8** for which PI5P4K $\alpha$  and  $\gamma$  pIC<sub>50</sub>s were determined.

| PI5P4K $\alpha$ pIC <sub>50</sub> | PI5P4K $\gamma$ + pIC <sub>50</sub> | SMILES                                                 | Supplier Reference | Supplier  |
|-----------------------------------|-------------------------------------|--------------------------------------------------------|--------------------|-----------|
| < 4.5                             | 4.6                                 | <chem>Clc1ccc(cc1)Nc1ncnc2n(nc12)Cc1cccc1</chem>       | BCC0079216         | BioAscent |
| < 4.3                             |                                     | <chem>Clc1ccc(cc1)Cn1ncc2c(ncnc12)NCCN1CCOCC1</chem>   | BCC0084467         | BioAscent |
| 4.2                               | < 4.1                               | <chem>Cc1ccc(c(c1)C)-n1ncc2c(ncnc12)NCc1ccco1</chem>   | BCC0088554         | BioAscent |
| < 4.6                             |                                     | <chem>Cc1ccc(cc1)Nc1ncnc2n(nc12)C</chem>               | BCC0093607         | BioAscent |
| 4.8                               | 4.7                                 | <chem>C1COc2cc(ccc2O1)Nc1ncnc2n(nc12)-c1cccc1</chem>   | BCC0091042         | BioAscent |
| < 4.4                             | < 4.4                               | <chem>COc1cccc(c1)Nc1ncnc2n(nc12)C</chem>              | BCC0087286         | BioAscent |
| 4.6                               | 5.1                                 | <chem>CC(C)Nc1ncnc2n(nc12)-c1ccc(cc1)Cl</chem>         | BCC0088579         | BioAscent |
| < 4.4                             | < 4.4                               | <chem>COc1ccc(cc1)Nc1ncnc2n(nc12)C</chem>              | BCC0003196         | BioAscent |
| < 4.1                             | < 4.1                               | <chem>Cc1ccc(c(c1)C)-n1ncc2c(ncnc12)N1CCCC1</chem>     | BCC0060184         | BioAscent |
| < 4.3                             | < 4.3                               | <chem>Cn1ncc2c(ncnc12)Nc1ccc(c(c1)F)F</chem>           | Z204264234         | Enamine   |
| < 4.4                             | 4.6                                 | <chem>CC(=O)Nc1ccc(cc1Cl)Nc1ncnc2n(nc12)C</chem>       | Z229452868         | Enamine   |
| 4.5                               | < 4.3                               | <chem>Cc1ccc(cc1C)Nc1ncnc2n(nc12)C</chem>              | Z223814982         | Enamine   |
| < 4.3                             | < 4.3                               | <chem>Cc1ccc(cc1C)Nc1ncnc2n(nc12)-c1cc(ccc1C)Cl</chem> | Z1041113974        | Enamine   |
| 5.6                               | < 4.3                               | <chem>Clc1cccc(c1)Nc1ncnc2n(nc12)-c1cccc1</chem>       | Z961104450         | Enamine   |
| < 4.3                             | < 4.3                               | <chem>Cn1ncc2c(ncnc12)Nc1cccc(c1)CN1CCSCC1</chem>      | Z1127123360        | Enamine   |
| 4.4                               | < 4.3                               | <chem>Cn1ncc2c(ncnc12)Nc1ccc(c(c1)F)OC(F)F</chem>      | Z2241126335        | Enamine   |
| < 4.4                             | 4.9                                 | <chem>Cn1ncc2c(ncnc12)Nc1ccc(c(c1)F)N1CCCC1F</chem>    | Z2241124305        | Enamine   |
| < 4.3                             | < 4.3                               | <chem>Cn1ncc2c(ncnc12)Nc1cccc(c1)Cn1cnc1</chem>        | Z2241113362        | Enamine   |
| < 4.3                             | < 4.3                               | <chem>CC(=O)N1CCc2cc(ccc21)Nc1ncnc2n(nc12)C</chem>     | Z2241092261        | Enamine   |
| 4.9                               | 5.5                                 | <chem>Cc1ccc(cc1N1CCCC1=O)Nc1ncnc2n(nc12)C</chem>      | Z229387906         | Enamine   |
| 5.1                               | 7                                   | <chem>Cn1ncc2c(ncnc12)Nc1ccc(cc1)N1CCCC1=O</chem>      | Z223819888         | Enamine   |



|       |       |                                                |            |           |
|-------|-------|------------------------------------------------|------------|-----------|
| 4.8   | 6.4   | COc1ccc(ccc1N1CCCC1=O)Nc1ncnc2n(ncc12)C        | Z229248342 | Enamine   |
| < 4.3 | < 4.3 | Cc1ccc(cc1C)-n1ncc2c(ncnc12)Nc1cccc(c1)Cl      | K405-3091  | Molport   |
| < 4.3 | < 4.3 | COc1ccc(cc1)-n1ncc2c(ncnc12)Nc1ccc(c(c1)Cl)Cl  | K402-0238  | Molport   |
| < 4.3 | < 4.3 | Fc1ccc(cc1Cl)Nc1ncnc2n(ncc12)-c1ccc(cc1)Cl     | K402-0256  | Molport   |
| < 4.3 | < 4.3 | CC(=O)Nc1ccc(cc1)Nc1ncnc2n(ncc12)-c1cccc1      | STK895676  | Molport   |
| 5.8   | < 4.3 | COc1cccc(c1)Nc1ncnc2n(ncc12)-c1ccc(cc1)C       | STK846763  | Molport   |
| < 4.3 | < 4.3 | CN(C)c1nc(c2cnn(c2n1)-c1cccc1)Nc1cccc(c1)Cl    | STK890531  | Molport   |
| < 4.3 | < 4.3 | Clc1cccc(c1)Nc1nc(nc2n(ncc12)-c1cccc1)N1CCOCC1 | STK890534  | Molport   |
| 6.0   | < 4.3 | Cc1ccc(cc1-n1ncc2c(ncnc12)Nc1cccc(c1)Cl)Cl     | STK944236  | Molport   |
| < 4.5 | < 4.3 | Cc1ccc(cc1Cl)Nc1ncnc2n(ncc12)-c1cccc1          | STK889794  | Molport   |
| < 5.8 | < 4.3 | COc1ccc(cc1Cl)Nc1ncnc2n(ncc12)-c1ccc(cc1)F     | STK859117  | Molport   |
| < 4.3 | < 4.3 | N(c1cccc1)c1ncnc2n(ncc12)-c1cccc1              | STK731132  | Molport   |
| < 4.3 | < 4.3 | Cc1ccc(cc1Cl)-n1ncc2c(ncnc12)Nc1cccc(c1)Cl     | STK944294  | Molport   |
| < 4.3 | < 4.3 | CNc1nc(c2cnn(c2n1)-c1cccc1)Nc1cccc(c1)Cl       | STK890512  | Molport   |
| < 4.3 | < 4.3 | COc1ccc(cc1Nc1ncnc2n(ncc12)-c1ccc(c(c1)Cl)C)Cl | STK944287  | Molport   |
| 6.1   | < 4.3 | COc1ccc(cc1)-n1ncc2c(ncnc12)Nc1cccc(c1)Cl      | STK889900  | Molport   |
| < 4.3 | < 4.5 | Cc1cccc(c1)-n1ncc2c(ncnc12)NCC1CCCO1           | BCC0088601 | BioAscent |
| < 4.5 | 4.7   | Cn1ncc2c(ncnc12)Nc1ccc(cc1)-c1nccs1            | BCC0010467 | BioAscent |
| 5.6   | < 4.5 | Cc1nc(cs1)-c1ccc(o1)CNc1ncnc2n(ncc12)C         | BCC0011074 | BioAscent |
| < 4.3 | < 4.5 | COc1ccc(cc1)C(=O)C1CCN(CC1)c1ncnc2n(ncc12)C    | BCC0017566 | BioAscent |
| 5.1   | NA    | Clc1ccc(cc1)-n1ncc2c(ncnc12)Nc1cccnc1          | K402-0947  | ChemDiv   |
| < 4.6 | NA    | Cn1ncc2c(ncnc12)NCCc1ccc(cc1)Cl                | K405-2657  | ChemDiv   |

**Table S4.** Potency data for **7** against PI5P4K isoforms using ADP-Glo™ assays

| Kinase            | pIC <sub>50</sub> |
|-------------------|-------------------|
| PI5P4K $\alpha$   | <4.3              |
| PI5P4K $\beta$    | <4.3              |
| PI5P4K $\gamma$ + | <4.3              |

**Table S5.** Crystallographic data and structure refinement for **7** (CSD: 2237386).

|                                        |                                        |
|----------------------------------------|----------------------------------------|
| Crystal Habitus                        | Colourless block                       |
| Device Type                            | Bruker D8-QUEST PHOTON-100             |
| Empirical formula                      | C17 H18 F3 N6 O2 +, Cl -               |
| Formula weight                         | 430.82                                 |
| Temperature/K                          | 180 (2)                                |
| Crystal system                         | Monoclinic                             |
| Space group                            | P 21/n                                 |
| a/Å                                    | 6.6397(2)                              |
| b/Å                                    | 10.0511(3)                             |
| c/Å                                    | 28.1099(9)                             |
| $\alpha$ /°                            | 90                                     |
| $\beta$ /°                             | 93.840(2)                              |
| $\gamma$ /°                            | 90                                     |
| Volume/Å <sup>3</sup>                  | 1871.74(10)                            |
| Z                                      | 4                                      |
| $\rho_{\text{calc}}$ /cm <sup>3</sup>  | 1.529                                  |
| $\mu$ /mm <sup>-1</sup>                | 2.334                                  |
| F(000)                                 | 888                                    |
| Crystal size/mm <sup>3</sup>           | 0.10 × 0.06 × 0.06                     |
| Absorption correction                  | Multi-scan                             |
| Radiation                              | CuK $\alpha$ ( $\lambda$ = 1.5418)     |
| 2 $\theta$ range for data collection/° | 3.15 to 66.83°                         |
| Completeness to theta                  | 0.998                                  |
| Index ranges                           | -7 ≤ h ≤ 7, -81 ≤ k ≤ 11, -33 ≤ l ≤ 30 |

|                                       |                           |
|---------------------------------------|---------------------------|
| Reflections collected                 | 17933                     |
| Data/restraints/parameters            | 3304/0/282                |
| Goodness-of-fit on F <sup>2</sup>     | 1.060                     |
| Final R indexes [ $I >= 2\sigma(I)$ ] | R1 = 0.0348, wR2 = 0.0847 |
| Final R indexes [all data]            | R1 = 0.0422, wR2 = 0.0894 |

**Table S6.** Crystallographic bond lengths data for compound **7**.

| Atom | Atom | Length/Å | Atom | Atom | Length/Å |
|------|------|----------|------|------|----------|
| F1   | C7   | 1.327(2) | C2   | C3   | 1.390(2) |
| F2   | C7   | 1.349(2) | C2   | H2A  | 0.95     |
| F3   | C7   | 1.332(2) | C3   | C4   | 1.389(3) |
| O1   | C8   | 1.233(2) | C3   | C7   | 1.493(3) |
| O2   | C13  | 1.233(2) | C4   | C5   | 1.386(3) |
| N1   | C8   | 1.349(2) | C4   | H4A  | 0.95     |
| N1   | C1   | 1.414(2) | C5   | C6   | 1.381(3) |
| N1   | H1   | 0.84(2)  | C5   | H5A  | 0.95     |
| N2   | C10  | 1.352(2) | C6   | H6A  | 0.95     |
| N2   | C11  | 1.357(2) | C8   | C9   | 1.488(2) |
| N2   | H2   | 0.83(3)  | C9   | C10  | 1.358(3) |
| N3   | C11  | 1.312(2) | C9   | C12  | 1.438(2) |
| N3   | C12  | 1.355(2) | C10  | H10A | 0.95     |
| N4   | C12  | 1.319(2) | C14  | C15  | 1.548(2) |
| N4   | H41  | 0.85(3)  | C14  | H14A | 0.99     |
| N4   | H42  | 0.89(3)  | C14  | H14B | 0.99     |
| N5   | C11  | 1.358(2) | C15  | C17  | 1.515(3) |
| N5   | C13  | 1.410(2) | C15  | C16  | 1.520(3) |
| N5   | C14  | 1.468(2) | C16  | H16A | 0.98     |
| N6   | C13  | 1.323(2) | C16  | H16B | 0.98     |
| N6   | C15  | 1.468(2) | C16  | H16C | 0.98     |
| N6   | H6   | 0.86(2)  | C17  | H17A | 0.98     |
| C1   | C2   | 1.387(2) | C17  | H17B | 0.98     |
| C1   | C6   | 1.393(3) | C17  | H17C | 0.98     |

**Table S7.** Crystallographic bond angles data for compound **7**.

| Atom | Atom | Atom | Angle/°    | Atom | Atom | Atom | Angle/°    |
|------|------|------|------------|------|------|------|------------|
| C8   | N1   | C1   | 126.80(16) | O1   | C8   | C9   | 121.48(16) |
| C8   | N1   | H1   | 118.6(15)  | N1   | C8   | C9   | 114.22(15) |
| C1   | N1   | H1   | 113.4(16)  | C10  | C9   | C12  | 116.74(16) |
| C10  | N2   | C11  | 119.56(17) | C10  | C9   | C8   | 121.59(16) |
| C10  | N2   | H2   | 123.2(16)  | C12  | C9   | C8   | 121.61(16) |
| C11  | N2   | H2   | 117.3(16)  | N2   | C10  | C9   | 120.73(16) |
| C11  | N3   | C12  | 117.82(15) | N2   | C10  | H10A | 119.6      |
| C12  | N4   | H41  | 119.3(16)  | C9   | C10  | H10A | 119.6      |
| C12  | N4   | H42  | 121.9(15)  | N3   | C11  | N2   | 123.71(16) |
| H41  | N4   | H42  | 118(2)     | N3   | C11  | N5   | 118.37(16) |
| C11  | N5   | C13  | 126.14(15) | N2   | C11  | N5   | 117.92(16) |
| C11  | N5   | C14  | 121.87(15) | N4   | C12  | N3   | 116.63(16) |
| C13  | N5   | C14  | 111.99(14) | N4   | C12  | C9   | 122.17(16) |
| C13  | N6   | C15  | 115.72(16) | N3   | C12  | C9   | 121.16(16) |
| C13  | N6   | H6   | 123.8(15)  | O2   | C13  | N6   | 128.67(18) |
| C15  | N6   | H6   | 120.3(15)  | O2   | C13  | N5   | 124.50(16) |
| C2   | C1   | C6   | 119.96(16) | N6   | C13  | N5   | 106.84(16) |
| C2   | C1   | N1   | 122.66(16) | N5   | C14  | C15  | 103.44(15) |
| C6   | C1   | N1   | 117.29(16) | N5   | C14  | H14A | 111.1      |
| C1   | C2   | C3   | 118.82(16) | C15  | C14  | H14A | 111.1      |

|    |    |     |            |      |     |      |            |
|----|----|-----|------------|------|-----|------|------------|
| C1 | C2 | H2A | 120.6      | N5   | C14 | H14B | 111.1      |
| C3 | C2 | H2A | 120.6      | C15  | C14 | H14B | 111.1      |
| C4 | C3 | C2  | 121.86(17) | H14A | C14 | H14B | 109        |
| C4 | C3 | C7  | 119.34(16) | N6   | C15 | C17  | 109.53(17) |
| C2 | C3 | C7  | 118.77(16) | N6   | C15 | C16  | 109.88(16) |
| C5 | C4 | C3  | 118.30(17) | C17  | C15 | C16  | 111.47(18) |
| C5 | C4 | H4A | 120.8      | N6   | C15 | C14  | 102.01(14) |
| C3 | C4 | H4A | 120.8      | C17  | C15 | C14  | 112.37(17) |
| C6 | C5 | C4  | 120.84(18) | C16  | C15 | C14  | 111.17(17) |
| C6 | C5 | H5A | 119.6      | C15  | C16 | H16A | 109.5      |
| C4 | C5 | H5A | 119.6      | C15  | C16 | H16B | 109.5      |
| C5 | C6 | C1  | 120.21(17) | H16A | C16 | H16B | 109.5      |
| C5 | C6 | H6A | 119.9      | C15  | C16 | H16C | 109.5      |
| C1 | C6 | H6A | 119.9      | H16A | C16 | H16C | 109.5      |
| F1 | C7 | F3  | 107.62(17) | H16B | C16 | H16C | 109.5      |
| F1 | C7 | F2  | 104.87(17) | C15  | C17 | H17A | 109.5      |
| F3 | C7 | F2  | 105.11(15) | C15  | C17 | H17B | 109.5      |
| F1 | C7 | C3  | 113.29(16) | H17A | C17 | H17B | 109.5      |
| F3 | C7 | C3  | 113.17(16) | C15  | C17 | H17C | 109.5      |
| F2 | C7 | C3  | 112.10(17) | H17A | C17 | H17C | 109.5      |
| O1 | C8 | N1  | 124.30(16) | H17B | C17 | H17C | 109.5      |

**Table S8.** Lipid kinase selectivity screening for **7** at 10  $\mu$ M against a kinase panel of 22 lipid kinase targets generated using KINOMEScan™ technology<sup>a</sup> at DiscoverX.

| Kinase                             | % activity remaining |
|------------------------------------|----------------------|
| PIK3C2B                            | 93                   |
| PIK3C2G                            | 100                  |
| PIK3CA                             | 100                  |
| PIK3CA(C420R)                      | 100                  |
| PIK3CA(E542K)                      | 100                  |
| PIK3CA(E545A)                      | 100                  |
| PIK3CA(E545K)                      | 100                  |
| PIK3CA(H1047L)                     | 100                  |
| PIK3CA(H1047Y)                     | 95                   |
| PIK3CA(I800L)                      | 100                  |
| PIK3CA(M1043I)                     | 100                  |
| PIK3CA(Q546K)                      | 100                  |
| PIK3CB                             | 100                  |
| PIK3CD                             | 100                  |
| PIK3CG                             | 100                  |
| PIK4CB                             | 98                   |
| PIKFYVE                            | 100                  |
| PIP5K1A                            | 99                   |
| PIP5K1C                            | 100                  |
| PIP5K2B (PI5P4KB, PI5P4K $\beta$ ) | 100                  |
| PIP5K2C (PI5P4KC)                  | 100                  |
| VPS34                              | 100                  |

<sup>a</sup> Data were generated at Eurofins Discovery using DiscoverX KINOMEScan™ technology. Streptavidin-coated magnetic beads were treated with biotinylated small molecule ligands for 30 minutes at room temperature to generate affinity resins for kinase assays. The liganded beads were blocked with excess biotin and washed with blocking buffer (SeaBlock (Pierce), 1% BSA, 0.05% Tween 20, 1 mM DTT) to remove unbound ligand and to reduce non-specific binding. Binding reactions were assembled by combining kinases, liganded affinity beads, and test compounds in 1x binding buffer (20% SeaBlock, 0.17x PBS, 0.05% Tween 20, 6 mM DTT). Test compounds were prepared as 111X stocks in 100% DMSO. Kds were determined using an 11-point 3-fold compound dilution series with three DMSO control points. All compounds for Kd measurements are distributed by acoustic transfer (non-contact dispensing) in 100% DMSO. The compounds were then diluted directly into the assays such that the final concentration of DMSO was 0.9%. All reactions performed in polypropylene 384-well plate. Each was a final volume of 0.02 ml. The assay plates were incubated at room temperature with shaking for

1 hour and the affinity beads were washed with wash buffer (1x PBS, 0.05% Tween 20). The beads were then re-suspended in elution buffer (1x PBS, 0.05% Tween 20, 0.5  $\mu$ M nonbiotinylated affinity ligand) and incubated at room temperature with shaking for 30 minutes. The kinase concentration in the eluates was measured by qPCR.

**Table S9.** Lipid kinase selectivity screening for **7** at 10  $\mu$ M against a kinase panel of 15 protein kinase targets using ADP-Glo™ assay at the MRC PPU International Centre for Kinase Profiling, University of Dundee.

| Kinase                     | % activity remaining | s.d. |
|----------------------------|----------------------|------|
| PI3K g                     | 79                   | 8    |
| PI3Ka E524K + p85          | 93                   | 4    |
| PIK4CB                     | 94                   | 0    |
| DGK b                      | 97                   | 8    |
| SPHK1                      | 98                   | 12   |
| CHK b                      | 99                   | 1    |
| SPHK2                      | 99                   | 5    |
| DGK g                      | 100                  | 7    |
| PI4K2a                     | 100                  | 1    |
| CHK a                      | 101                  | 2    |
| DGK z                      | 101                  | 9    |
| PIP5K2A (PI5P4K $\alpha$ ) | 104                  | 4    |
| PI3K a                     | 106                  | 7    |
| PI3Ka E545K + p85          | 107                  | 0    |
| PI3K b                     | 109                  | 3    |

**Table S10.** lipid kinase selectivity screen at 1  $\mu$ M for compound **36**. Conducted by MRC PPU International Centre for Kinase Profiling, using a 1  $\mu$ M concentration of **36** against a panel of 16 lipid kinases.

| protein           | residual activity (%) | s.d. |
|-------------------|-----------------------|------|
| PI3K beta         | 83.1                  | 0.0  |
| PI3K gamma        | 100.3                 | 1.9  |
| PI3K alpha        | 83.8                  | 9.2  |
| PI3Ka E524K + p85 | 101.5                 | 2.3  |
| PI3Ka E545K + p85 | 97.6                  | 5.4  |
| PI4K2a            | 95.7                  | 4.3  |
| PIK4Cb            | 100.6                 | 5.1  |
| CHK beta          | 93.4                  | 5.2  |
| CHK alpha         | 87.8                  | 2.0  |
| PIP5K2a           | 15.6                  | 1.1  |
| SPHK2             | 81.7                  | 4.0  |
| DGK beta          | 100.4                 | 4.5  |
| DGK gamma         | 105.5                 | 1.2  |
| DGK zeta          | 100.1                 | 4.4  |
| SPHK1             | 92.9                  | 0.1  |

**Table S11.** premier kinase screen at 1  $\mu$ M for compound **36**. Conducted by MRC PPU International Centre for Kinase Profiling, using a 1  $\mu$ M concentration of **36** against a panel of 140 enzymes.

| MRC PPU Gene Symbol | Entrez Gene Symbol | Residual activity (%) |
|---------------------|--------------------|-----------------------|
| ERK1                | MAPK3              | 62                    |
| JAK3                | JAK3               | 63                    |
| DYRK3               | DYRK3              | 68                    |
| TTBK1               | TTBK1              | 68                    |
| PDGFRA              | PDGFRA             | 70                    |
| MLK1                | MAP3K9             | 70                    |
| TTBK2               | TTBK2              | 70                    |

|                |                                |    |
|----------------|--------------------------------|----|
| PINK           | PINK1                          | 73 |
| PIM1           | PIM1                           | 75 |
| IKKb           | IKBKB                          | 75 |
| HIPK3          | HIPK3                          | 76 |
| MARK4          | MARK4                          | 76 |
| EIF2AK3        | EIF2AK3                        | 76 |
| RSK2           | RPS6KA3                        | 77 |
| PAK4           | PAK4                           | 78 |
| EPH-B3         | EPHB3                          | 79 |
| MAP4K5         | MAP4K5                         | 80 |
| HER4           | ERBB4                          | 80 |
| PKA            | PRKAC                          | 80 |
| Aurora A       | AURKA                          | 81 |
| MKK2           | MAP2K2                         | 82 |
| CHK1           | CHEK1                          | 82 |
| MLK3           | MAP3K11                        | 83 |
| EPH-A2         | EPHA2                          | 83 |
| TrkA           | NTRK1                          | 85 |
| EF2K           | EEF2K                          | 85 |
| JNK1           | MAPK8                          | 85 |
| MST2           | STK3                           | 86 |
| NEK2a          | NEK2                           | 86 |
| PRK2           | PKN2                           | 86 |
| PIM3           | PIM3                           | 87 |
| TGFBR1         | TGFBR1                         | 87 |
| OSR1           | OXR1                           | 87 |
| TTK            | TTK                            | 87 |
| MNK1           | MKNK1                          | 87 |
| TESK1          | TESK1                          | 88 |
| S6K1           | RPS6KB1                        | 89 |
| JNK3           | MAPK10                         | 89 |
| IKKe           | IKBKE                          | 89 |
| DYRK1A         | DYRK1A                         | 89 |
| ABL            | ABL1                           | 89 |
| PKBa           | AKT1                           | 90 |
| PLK1           | PLK1                           | 90 |
| HIPK2          | HIPK2                          | 90 |
| MNK2           | MKNK2                          | 90 |
| PRAK           | MAPKAPK5                       | 90 |
| PAK6           | PAK6                           | 90 |
| TAK1           | MAP3K7                         | 91 |
| RIPK2          | RIPK2                          | 92 |
| CK1 $\gamma$ 2 | CSNK1D                         | 92 |
| TBK1           | TBK1                           | 92 |
| ULK2           | ULK2                           | 92 |
| MELK           | MELK                           | 92 |
| CK1 $\delta$   | CSNK1G2                        | 92 |
| MAP4K3         | MAP4K3                         | 92 |
| STK33          | STK33                          | 93 |
| PKD1           | PKD1                           | 93 |
| Src            | SRC                            | 93 |
| AMPK (hum)     | PRKAA1 +<br>PRKAB2 +<br>PRKAG1 | 94 |
| PHK            | PHK                            | 94 |
| CDK9-Cyclin T1 | CDK9 + CCNT1                   | 94 |
| PAK5           | PAK5                           | 94 |
| Lck            | LCK                            | 95 |
| ERK5           | MAPK7                          | 95 |
| FGF-R1         | FGFR1                          | 95 |
| TLK1           | TLK1                           | 96 |
| IRR            | INSRR                          | 96 |
| ROCK 2         | ROCK2                          | 96 |
| MPSK1          | STK16                          | 96 |

|               |              |     |
|---------------|--------------|-----|
| CHK2          | CHEK2        | 96  |
| CAMKKb        | CAMKK2       | 96  |
| PKCa          | PRKCG        | 96  |
| PIM2          | PIM2         | 97  |
| SGK1          | SGK1         | 97  |
| EPH-B2        | EPHB2        | 97  |
| CK2           | CSNK2A1      | 97  |
| BRSK1         | BRSK1        | 97  |
| SYK           | SYK          | 97  |
| TSSK1         | TSSK1B       | 98  |
| YES1          | YES1         | 98  |
| p38a MAPK     | MAPK14       | 98  |
| IRAK1         | IRAK1        | 98  |
| PAK2          | PAK2         | 99  |
| CAMK1         | CAMK1        | 99  |
| BTK           | BTK          | 99  |
| ZAP70         | ZAP70        | 99  |
| SmMLCK        | MYLK         | 99  |
| EPH-B4        | EPHB4        | 99  |
| SRPK1         | SRPK1        | 99  |
| MST4          | STK26        | 99  |
| VEG-FR        | FLT1         | 99  |
| CDK2-Cyclin A | CDK2 + CCNA2 | 100 |
| p38g MAPK     | MAPK13       | 101 |
| LKB1          | STK11        | 101 |
| EPH-A4        | EPHA4        | 101 |
| MAPKAP-K3     | MAPKAPK3     | 101 |
| ULK1          | ULK1         | 102 |
| GSK3b         | GSK3B        | 102 |
| p38b MAPK     | MAPK11       | 103 |
| MSK1          | RPS6KA5      | 103 |
| PKBb          | AKT2         | 103 |
| NEK6          | NEK6         | 104 |
| CSK           | CSK          | 104 |
| HIPK1         | HIPK1        | 104 |
| MARK3         | MARK3        | 104 |
| TIE2          | TEK          | 105 |
| WNK1          | WNK1         | 105 |
| GCK           | GCK          | 105 |
| JNK2          | MAPK9        | 106 |
| ASK1          | MAP3K5       | 107 |
| PKCγ          | PRKCZ        | 107 |
| CLK2          | CLK2         | 107 |
| MINK1         | MINK1        | 107 |
| DYRK2         | DYRK2        | 108 |
| IR            | INSR         | 108 |
| SIK2          | SIK2         | 109 |
| RSK1          | RPS6KA1      | 109 |
| MAPKAP-K2     | MAPKAPK2     | 109 |
| ERK2          | MAPK1        | 110 |
| ERK8          | MAPK15       | 110 |
| Aurora B      | AURKB        | 110 |
| PKCz          | PRKCA        | 111 |
| BRSK2         | BRSK2        | 111 |
| TAO1          | TAOK1        | 111 |
| MKK1          | MAP2K1       | 112 |
| MARK1         | MARK1        | 113 |
| IRAK4         | IRAK4        | 113 |
| DDR2          | DDR2         | 115 |
| MKK6          | MAP2K6       | 115 |
| MEKK1         | MAP3K1       | 115 |
| DAPK1         | DAPK1        | 118 |
| IGF-1R        | IGF1R        | 119 |
| SIK3          | SIK3         | 123 |

|           |        |     |
|-----------|--------|-----|
| MST3      | STK24  | 124 |
| BRK       | PTK6   | 126 |
| EPH-B1    | EPHB1  | 126 |
| MARK2     | MARK2  | 127 |
| p38d MAPK | MAPK12 | 128 |
| PDK1      | PDPK1  | 133 |
| NUAK1     | NUAK1  | 138 |

**Table S12.** Data collection and refinement statistics for X-ray crystal structures of PI5P4K $\alpha$  bound to **36**.

|                                     |                               |
|-------------------------------------|-------------------------------|
| PDB ID                              | 8C8C                          |
| Protein/Ligand                      | PI5P4K $\alpha$ / <b>36</b>   |
| Wavelength [Å]                      | 0.9795                        |
| Space group                         | C 2 2 2 <sub>1</sub>          |
| Cell dimensions                     |                               |
| a; b; c; [Å]                        | 70.66; 84.94; 128.35          |
| $\alpha$ ; $\beta$ ; $\gamma$ ; [°] | 90.0; 90.0; 90.0              |
| Resolution [Å]                      | 2.10 (2.16-2.10) <sup>a</sup> |
| Unique reflections                  | 19434 (368) <sup>2</sup>      |
| Multiplicity                        | 1.9 (1.9) <sup>2</sup>        |
| Completeness [%]                    | 84.7 (19.6) <sup>2</sup>      |
| R <sub>sym</sub> [%]                | 4.0(53.2) <sup>2</sup>        |
| R <sub>meas</sub> [%]               | 5.6 (75.3) <sup>2</sup>       |
| Mean(I)/sd                          | 10.3 (1.4) <sup>2</sup>       |
| CC(1/2)                             | 0.996 (0.766)                 |
| Number of reflections (free)        | 32790(1640)                   |
| R <sub>cryst</sub> [%]              | 21.7                          |
| R <sub>free</sub> [%]               | 28.4                          |
| Total number of atoms:              |                               |
| Protein                             | 2429                          |
| Water                               | 130                           |
| Ligand                              | 27                            |
| Deviation from ideal geometry:      |                               |
| Bond lengths [Å]                    | 0.012                         |
| Bond angles [°]                     | 1.79                          |

<sup>a</sup>values in parenthesis refer to the highest resolution bin.

**Table S13.** Crystallographic data and structure refinement for compound **20** (CSD: 2237387).

|                                        |                                                                  |
|----------------------------------------|------------------------------------------------------------------|
| Crystal Habitus                        | Colourless block                                                 |
| Device Type                            | Bruker D8-QUEST PHOTON-100                                       |
| Empirical formula                      | C <sub>19</sub> H <sub>15</sub> Cl <sub>2</sub> N <sub>5</sub> O |
| Formula weight                         | 400.26                                                           |
| Temperature/K                          | 180 (2)                                                          |
| Crystal system                         | Monoclinic                                                       |
| Space group                            | P 2 <sub>1</sub> /c                                              |
| a/Å                                    | 11.3629(3)                                                       |
| b/Å                                    | 7.1919(2)                                                        |
| c/Å                                    | 22.2901(6)                                                       |
| $\alpha$ /°                            | 90                                                               |
| $\beta$ /°                             | 101.2060(10)                                                     |
| $\gamma$ /°                            | 90                                                               |
| Volume/Å <sup>3</sup>                  | 1786.84(8)                                                       |
| Z                                      | 4                                                                |
| $\rho_{\text{calc}}$ /cm <sup>-3</sup> | 1.488                                                            |
| $\mu$ /mm <sup>-1</sup>                | 3.440                                                            |

|                                                  |                                                                      |
|--------------------------------------------------|----------------------------------------------------------------------|
| F(000)                                           | 824                                                                  |
| Crystal size/mm <sup>3</sup>                     | 0.22 × 0.10 × 0.05                                                   |
| Absorption correction                            | Multi-scan                                                           |
| Radiation                                        | CuK $\alpha$ ( $\lambda$ = 1.5418)                                   |
| 2 $\theta$ range for data collection/ $^{\circ}$ | 3.97 to 70.32 $^{\circ}$                                             |
| Completeness to theta                            | 0.999                                                                |
| Index ranges                                     | -13 $\leq$ h $\leq$ 13, -8 $\leq$ k $\leq$ 8, -27 $\leq$ l $\leq$ 27 |
| Reflections collected                            | 30283                                                                |
| Data/restraints/parameters                       | 3416/0/250                                                           |
| Goodness-of-fit on F <sup>2</sup>                | 1.061                                                                |
| Final R indexes [ $I \geq 2\sigma(I)$ ]          | R1 = 0.0306, wR2 = 0.0746                                            |
| Final R indexes [all data]                       | R1 = 0.0360 wR2 = 0.0772                                             |

**Table S14.** Crystallographic bond lengths data for compound **20**.

| Atom | Atom | Length/Å   | Atom | Atom | Length/Å |
|------|------|------------|------|------|----------|
| C11  | C13  | 1.7400(15) | C12  | H12A | 0.95     |
| C12  | C21  | 1.7405(16) | C13  | C14  | 1.399(2) |
| O1   | C14  | 1.3621(19) | C14  | C15  | 1.386(2) |
| O1   | C17  | 1.433(2)   | C15  | C16  | 1.393(2) |
| N1   | C6   | 1.3415(19) | C15  | H15A | 0.95     |
| N1   | C2   | 1.349(2)   | C16  | H16A | 0.95     |
| C2   | N3   | 1.325(2)   | C17  | H17A | 0.98     |
| C2   | H2A  | 0.95       | C17  | H17B | 0.98     |
| N3   | C4   | 1.3489(19) | C17  | H17C | 0.98     |
| C4   | N9   | 1.3562(19) | C18  | C19  | 1.380(2) |
| C4   | C5   | 1.397(2)   | C18  | C23  | 1.395(2) |
| C5   | C7   | 1.416(2)   | C19  | C20  | 1.389(2) |
| C5   | C6   | 1.421(2)   | C19  | H19A | 0.95     |
| C6   | N10  | 1.3515(19) | C20  | C21  | 1.382(2) |
| C7   | N8   | 1.3213(19) | C20  | H20A | 0.95     |
| C7   | H7A  | 0.95       | C21  | C22  | 1.379(2) |
| N8   | N9   | 1.3744(17) | C22  | C23  | 1.395(2) |
| N9   | C18  | 1.4329(18) | C22  | H22A | 0.95     |
| N10  | C11  | 1.4153(19) | C23  | C24  | 1.502(2) |
| N10  | H10  | 0.84(2)    | C24  | H24A | 0.98     |
| C11  | C16  | 1.391(2)   | C24  | H24B | 0.98     |
| C11  | C12  | 1.395(2)   | C24  | H24C | 0.98     |
| C12  | C13  | 1.377(2)   |      |      |          |

**Table S15.** Crystallographic bond angle data for compound **20**.

| Atom | Atom | Atom | Angle/ $^{\circ}$ | Atom | Atom | Atom | Angle/ $^{\circ}$ |
|------|------|------|-------------------|------|------|------|-------------------|
| C14  | O1   | C17  | 116.87(13)        | C14  | C15  | C16  | 121.65(15)        |
| C6   | N1   | C2   | 117.96(13)        | C14  | C15  | H15A | 119.2             |
| N3   | C2   | N1   | 129.67(14)        | C16  | C15  | H15A | 119.2             |
| N3   | C2   | H2A  | 115.2             | C11  | C16  | C15  | 120.19(15)        |
| N1   | C2   | H2A  | 115.2             | C11  | C16  | H16A | 119.9             |
| C2   | N3   | C4   | 110.83(13)        | C15  | C16  | H16A | 119.9             |
| N3   | C4   | N9   | 125.83(13)        | O1   | C17  | H17A | 109.5             |
| N3   | C4   | C5   | 126.92(14)        | O1   | C17  | H17B | 109.5             |
| N9   | C4   | C5   | 107.21(12)        | H17A | C17  | H17B | 109.5             |
| C4   | C5   | C7   | 104.54(13)        | O1   | C17  | H17C | 109.5             |
| C4   | C5   | C6   | 115.62(13)        | H17A | C17  | H17C | 109.5             |
| C7   | C5   | C6   | 139.73(14)        | H17B | C17  | H17C | 109.5             |
| N1   | C6   | N10  | 120.64(13)        | C19  | C18  | C23  | 122.11(14)        |
| N1   | C6   | C5   | 118.92(13)        | C19  | C18  | N9   | 118.66(13)        |
| N10  | C6   | C5   | 120.38(13)        | C23  | C18  | N9   | 119.18(13)        |



|     |     |      |            |      |     |      |            |
|-----|-----|------|------------|------|-----|------|------------|
| N8  | C7  | C5   | 111.26(13) | C18  | C19 | C20  | 119.96(15) |
| N8  | C7  | H7A  | 124.4      | C18  | C19 | H19A | 120        |
| C5  | C7  | H7A  | 124.4      | C20  | C19 | H19A | 120        |
| C7  | N8  | N9   | 106.11(12) | C21  | C20 | C19  | 118.36(15) |
| C4  | N9  | N8   | 110.87(11) | C21  | C20 | H20A | 120.8      |
| C4  | N9  | C18  | 127.07(12) | C19  | C20 | H20A | 120.8      |
| N8  | N9  | C18  | 121.87(11) | C22  | C21 | C20  | 121.76(15) |
| C6  | N10 | C11  | 129.01(13) | C22  | C21 | C12  | 119.03(13) |
| C6  | N10 | H10  | 114.2(13)  | C20  | C21 | C12  | 119.20(13) |
| C11 | N10 | H10  | 116.0(13)  | C21  | C22 | C23  | 120.52(15) |
| C16 | C11 | C12  | 118.55(14) | C21  | C22 | H22A | 119.7      |
| C16 | C11 | N10  | 124.76(14) | C23  | C22 | H22A | 119.7      |
| C12 | C11 | N10  | 116.70(13) | C18  | C23 | C22  | 117.28(15) |
| C13 | C12 | C11  | 120.62(14) | C18  | C23 | C24  | 121.60(14) |
| C13 | C12 | H12A | 119.7      | C22  | C23 | C24  | 121.12(15) |
| C11 | C12 | H12A | 119.7      | C23  | C24 | H24A | 109.5      |
| C12 | C13 | C14  | 121.55(14) | C23  | C24 | H24B | 109.5      |
| C12 | C13 | C11  | 118.60(11) | H24A | C24 | H24B | 109.5      |
| C14 | C13 | C11  | 119.83(12) | C23  | C24 | H24C | 109.5      |
| O1  | C14 | C15  | 125.38(14) | H24A | C24 | H24C | 109.5      |
| O1  | C14 | C13  | 117.21(14) | H24B | C24 | H24C | 109.5      |
| C15 | C14 | C13  | 117.41(14) |      |     |      |            |

#### ADMET experimental methods

**MDR1-MDCK Permeability (bi-directional):** was performed by Cyprotex Discovery. Briefly, compounds were administered at 10  $\mu$ M (1% DMSO final) to the apical or basolateral side of a confluent monolayer of MDR1-MDCK cells, then incubated at 37 °C for 60 minutes before appearance on the opposite side of the monolayer was determined LC-MS/MS. The efflux ratio (ER) is calculated from the ratio of B-A to A-B permeabilities.

**Turbidimetric aqueous solubility:** analysis was performed by Cyprotex Discovery. Compound in DMSO at 10 mM was serially diluted to solutions of 0.1, 0.3, 1 and 3 mM in DMSO, then further diluted 1 in 100 in buffer (0.01 M PBS, pH 7.4, 1% DMSO final). 7 replicate wells of each dilution were equilibrated for 2 hours at 37 °C before absorbance is measured at 620 nm. The solubility is estimated from the concentration of test compound that produces an increase in absorbance above vehicle control (1% DMSO in buffer).

**Mouse Microsomal stability:** analysis was performed by Cyprotex Discovery. Briefly, test compounds in DMSO were incubated at a concentration of 1  $\mu$ M (0.25% DMSO final) with mouse hepatic microsomes (0.5 mg protein/mL) in the presence of NADPH (1 mM) at 37 °C. Aliquots were taken at time intervals (0, 5, 15, 30 and 45 min) and stopped by transferring into acetonitrile, then analysed using generic LC-MS/MS conditions for compound remaining, allowing the determination of the half-life for the compound.

### Consideration of dihedral angles for **32**, **35** and **36**

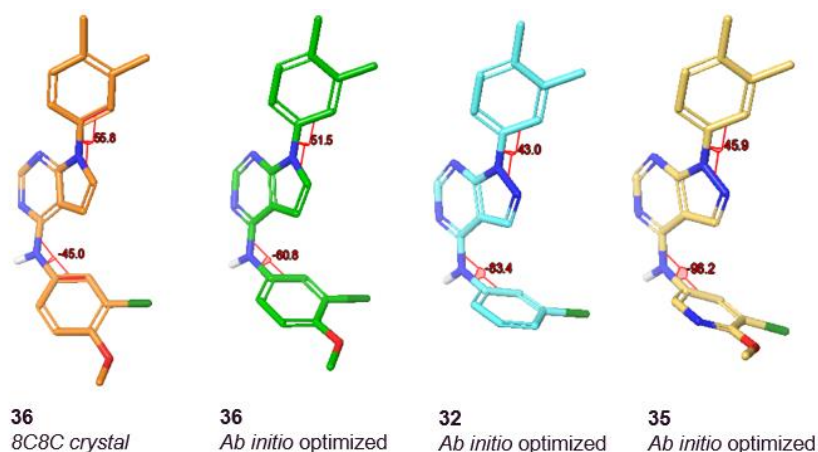

The  $\omega$  angle has a different ground state for **36**, **32** and **35** in the ‘bound’ conformation (main manuscript figure 4A;  $\psi = -7.5$ ). In the crystal structure this is  $-45$  degrees. QM optimization of the crystal structure conformation of **36** changes this  $\omega$  angle to  $-61$  degrees (energy difference between X-tal state and optimized state 9.6 kcal). This optimized conformation of **36** still fits into the active site. However, the  $\omega$  angles of **32** and **35** change to  $-83$  and  $-96$  degrees, respectively, on optimization. **32** and **35** do not fit into the crystal structure in that conformation as shown below:

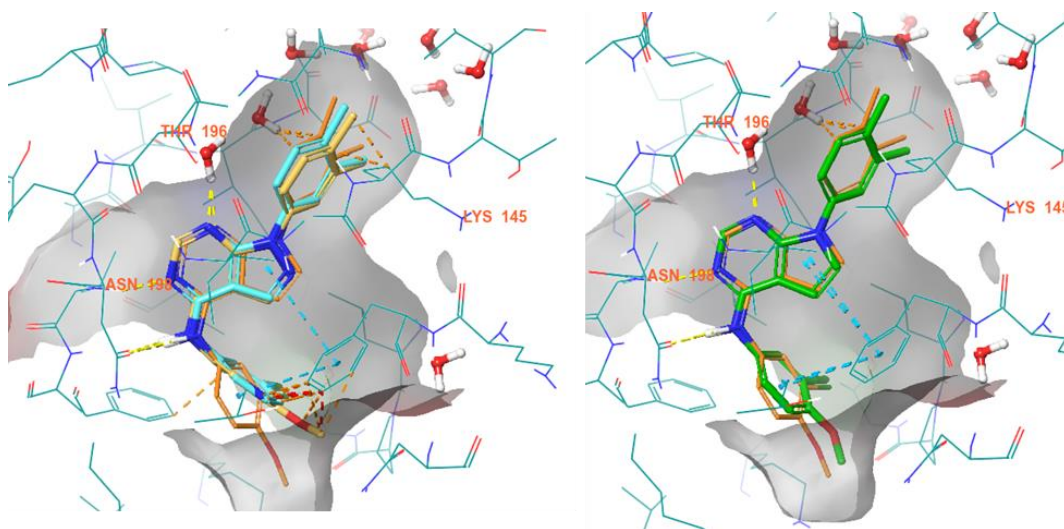

Left: **32** (cyan) and **35** (yellow) in their optimized conformation clash with Phe134 (indicated by orange and red dotted lines). Right: Ab initio optimized **36** does not show this clash. All ligands started from the same geometry and the same ab initio optimization was used.

## References

- (1) Abdou, N. S.; Serya, R. A. T.; Esmat, A.; Tolba, M. F.; Ismail, N. S. M.; Abouzid, K. A. M. Synthesis and in Vitro Antiproliferative Activity of Novel Pyrazolo[3,4-d]Pyrimidine Derivatives. *Medchemcomm* **2015**, *6* (8), 1518–1534.
- (2) Das, J.; Moquin, R. v.; Pitt, S.; Zhang, R.; Shen, D. R.; McIntyre, K. W.; Gillooly, K.; Doweiko, A. M.; Sack, J. S.; Zhang, H.; Kiefer, S. E.; Kish, K.; McKinnon, M.; Barrish, J. C.; Dodd, J. H.; Schieven, G. L.; Leftheris, K. Pyrazolo-Pyrimidines: A Novel Heterocyclic Scaffold for Potent and Selective P38 $\alpha$  Inhibitors. *Bioorg Med Chem Lett* **2008**, *18* (8), 2652–2657.
- (3) Voss, M. D.; Czechtizky, W.; Li, Z.; Rudolph, C.; Petry, S.; Brummerhop, H.; Langer, T.; Schiffer, A.; Schaefer, H. L. Discovery and Pharmacological Characterization of a Novel Small Molecule Inhibitor of Phosphatidylinositol-5-Phosphate 4-Kinase, Type II, Beta. *Biochem Biophys Res Commun* **2014**, *449* (3), 327–331.
- (4) Kampe, K-D.; Granzer, E.; Leineweber, D.; Rackur, G.; Boeger, H. G. 4-Amino-2-ureidopyrimidine-5-carboxamides, a process for the preparation thereof, pharmaceuticals containing these compounds, and the use thereof. **2002**, CA2089954C.
